# Supplementary material
Source: MDPI journal article supplement (https://www.mdpi.com/2073-4352/2/3/1239)
Supplement: s1 [file s1]

 
data_hsy712cu 
 
_audit_creation_method            SHELXL-97 
_chemical_name_systematic 
; 
ethyl 4-(4-hydroxyphenyl) -6-(6-methoxy-2-naphthyl)-2-oxocyclohex
-3-ene-1-carboxylate 
; 
_chemical_name_common             ? 
_chemical_melting_point           ? 
_chemical_formula_moiety 'C26 H24 O5' 
_chemical_formula_sum 	 'C26 H24 O5' 
_chemical_formula_weight          416.45 
 
loop_ 
 _atom_type_symbol 
 _atom_type_description 
 _atom_type_scat_dispersion_real 
 _atom_type_scat_dispersion_imag 
 _atom_type_scat_source 
 'C'  'C'   0.0181   0.0091 
 'International Tables Vol C Tables 4.2.6.8 and 6.1.1.4' 
 'H'  'H'   0.0000   0.0000 
 'International Tables Vol C Tables 4.2.6.8 and 6.1.1.4' 
 'O'  'O'   0.0492   0.0322 
 'International Tables Vol C Tables 4.2.6.8 and 6.1.1.4' 
 
_symmetry_cell_setting            monoclinic 
_symmetry_space_group_name_H-M    'C 2/c'
_symmetry_space_group_name_Hall    '-C 2yc' 
 
loop_ 
 _symmetry_equiv_pos_as_xyz 
 'x, y, z' 
 '-x, y, -z+1/2' 
 'x+1/2, y+1/2, z' 
 '-x+1/2, y+1/2, -z+1/2' 
 '-x, -y, -z' 
 'x, -y, z-1/2' 
 '-x+1/2, -y+1/2, -z' 
 'x+1/2, -y+1/2, z-1/2' 
 
_cell_length_a                    25.4114(5) 
_cell_length_b                    8.47440(10) 
_cell_length_c                    20.6921(4) 
_cell_angle_alpha                 90.00 
_cell_angle_beta                  108.328(2) 
_cell_angle_gamma                 90.00 
_cell_volume                      4229.92(13) 
_cell_formula_units_Z             8 
_cell_measurement_temperature     123(2) 
_cell_measurement_reflns_used     7850 
_cell_measurement_theta_min       3.6449 
_cell_measurement_theta_max       75.5307
 
_exptl_crystal_description        prism 
_exptl_crystal_colour             colorless 
_exptl_crystal_size_max           0.44 
_exptl_crystal_size_mid           0.38 
_exptl_crystal_size_min           0.29 
_exptl_crystal_density_meas       ? 
_exptl_crystal_density_diffrn     1.308 
_exptl_crystal_density_method     'not measured' 
_exptl_crystal_F_000              1760 
_exptl_absorpt_coefficient_mu     0.733 
_exptl_absorpt_correction_type    multi-scan 
_exptl_absorpt_correction_T_min   0.94337 
_exptl_absorpt_correction_T_max   1.00000 
_exptl_absorpt_process_details     
;
CrysAlisPro, Agilent Technologies,
Version 1.171.35.21 (release 20-01-2012 CrysAlis171 .NET)
(compiled Jan 23 2012,18:06:46)
Empirical absorption correction using spherical harmonics,
 implemented in SCALE3 ABSPACK scaling algorithm.
; 
_exptl_special_details 
; 
 ? 
; 
 
_diffrn_ambient_temperature       123(2) 
_diffrn_radiation_wavelength      1.54178 
_diffrn_radiation_type            CuK\a 
_diffrn_radiation_source          'Enhance (Cu) X-ray Source' 
_diffrn_radiation_monochromator   graphite 
_diffrn_measurement_device_type   'Xcalibur, Ruby, Gemini' 
_diffrn_measurement_method        '\w scans' 
_diffrn_detector_area_resol_mean  10.5081 
_diffrn_standards_number          ? 
_diffrn_standards_interval_count  ? 
_diffrn_standards_interval_time   ? 
_diffrn_standards_decay_%         ? 
_diffrn_reflns_number             13998 
_diffrn_reflns_av_R_equivalents   0.0243 
_diffrn_reflns_av_sigmaI/netI     0.0191 
_diffrn_reflns_limit_h_min        -29 
_diffrn_reflns_limit_h_max        31 
_diffrn_reflns_limit_k_min        -10 
_diffrn_reflns_limit_k_max        10 
_diffrn_reflns_limit_l_min        -25 
_diffrn_reflns_limit_l_max        14 
_diffrn_reflns_theta_min          3.66 
_diffrn_reflns_theta_max          75.71 
_reflns_number_total              4326 
_reflns_number_gt                 4167 
_reflns_threshold_expression      >2sigma(I) 
 
_computing_data_collection
;
CrysAlisPro, Agilent Technologies,
Version 1.171.35.21 (release 20-01-2012 CrysAlis171 .NET)
(compiled Jan 23 2012,18:06:46)
;
_computing_cell_refinement
;
CrysAlisPro, Agilent Technologies,
Version 1.171.35.21 (release 20-01-2012 CrysAlis171 .NET)
(compiled Jan 23 2012,18:06:46)
;
_computing_data_reduction
;
CrysAlisPro, Agilent Technologies,
Version 1.171.35.21 (release 20-01-2012 CrysAlis171 .NET)
(compiled Jan 23 2012,18:06:46)
; 
_computing_structure_solution     'SHELXS-97 (Sheldrick, 2008)' 
_computing_structure_refinement   'SHELXL-97 (Sheldrick, 2008)' 
_computing_molecular_graphics     'SHELXTL (Sheldrick, 2008)' 
_computing_publication_material   'SHELXTL (Sheldrick, 2008)' 
 
_refine_special_details 
; 
 Refinement of F^2^ against ALL reflections.  The weighted R-factor wR and 
 goodness of fit S are based on F^2^, conventional R-factors R are based 
 on F, with F set to zero for negative F^2^. The threshold expression of 
 F^2^ > 2sigma(F^2^) is used only for calculating R-factors(gt) etc. and is 
 not relevant to the choice of reflections for refinement.  R-factors based 
 on F^2^ are statistically about twice as large as those based on F, and R- 
 factors based on ALL data will be even larger. 
; 
 
_refine_ls_structure_factor_coef  Fsqd  
_refine_ls_matrix_type            full 
_refine_ls_weighting_scheme       calc  
_refine_ls_weighting_details 
 'calc w=1/[\s^2^(Fo^2^)+(0.0857P)^2^+12.9891P] where P=(Fo^2^+2Fc^2^)/3' 
_atom_sites_solution_primary      direct 
_atom_sites_solution_secondary    difmap 
_atom_sites_solution_hydrogens    geom 
_refine_ls_hydrogen_treatment     constr 
_refine_ls_extinction_method      none 
_refine_ls_extinction_coef        ? 
_refine_ls_number_reflns          4326 
_refine_ls_number_parameters      306 
_refine_ls_number_restraints      82 
_refine_ls_R_factor_all           0.0961 
_refine_ls_R_factor_gt            0.0938 
_refine_ls_wR_factor_ref          0.2328 
_refine_ls_wR_factor_gt           0.2313 
_refine_ls_goodness_of_fit_ref    1.096 
_refine_ls_restrained_S_all       1.091 
_refine_ls_shift/su_max           0.000 
_refine_ls_shift/su_mean          0.000 
 
loop_ 
 _atom_site_label 
 _atom_site_type_symbol 
 _atom_site_fract_x 
 _atom_site_fract_y 
 _atom_site_fract_z 
 _atom_site_U_iso_or_equiv 
 _atom_site_adp_type 
 _atom_site_occupancy 
 _atom_site_symmetry_multiplicity 
 _atom_site_calc_flag 
 _atom_site_refinement_flags 
 _atom_site_disorder_assembly 
 _atom_site_disorder_group 
O1A O 0.68353(16) 0.3396(4) 0.88544(17) 0.0618(10) Uani 0.690(2) 1 d PD A 1 
H1A H 0.6999 0.2713 0.8693 0.093 Uiso 0.690(2) 1 calc PR A 1 
C1A C 0.65078(11) 0.4305(3) 0.83375(12) 0.0419(10) Uani 0.690(2) 1 d PGD A 1 
C2A C 0.66916(13) 0.5822(4) 0.82697(15) 0.0433(9) Uani 0.690(2) 1 d PGD A 1 
H2A H 0.7044 0.6164 0.8556 0.052 Uiso 0.690(2) 1 calc PR A 1 
C3A C 0.63602(19) 0.6838(4) 0.7783(2) 0.0445(7) Uani 0.690(2) 1 d PGD A 1 
H3A H 0.6486 0.7875 0.7736 0.053 Uiso 0.690(2) 1 calc PR A 1 
C4A C 0.58451(18) 0.6337(5) 0.7364(2) 0.0388(6) Uani 0.690(2) 1 d PGD A 1 
C5A C 0.56612(12) 0.4820(5) 0.74315(18) 0.0406(7) Uani 0.690(2) 1 d PGD A 1 
H5A H 0.5309 0.4478 0.7145 0.049 Uiso 0.690(2) 1 calc PR A 1 
C6A C 0.59926(12) 0.3804(4) 0.79185(15) 0.0427(10) Uani 0.690(2) 1 d PGD A 1 
H6A H 0.5867 0.2767 0.7965 0.051 Uiso 0.690(2) 1 calc PR A 1 
O2A O 0.51805(19) 1.1608(5) 0.6663(3) 0.0603(13) Uani 0.690(2) 1 d PD A 1 
C7A C 0.5470(2) 0.7476(6) 0.6878(3) 0.0390(9) Uani 0.690(2) 1 d PD A 1 
C8A C 0.55058(18) 0.9054(6) 0.6992(3) 0.0418(12) Uani 0.690(2) 1 d PD A 1 
H8A H 0.5785 0.9428 0.7385 0.050 Uiso 0.690(2) 1 calc PR A 1 
C9A C 0.51475(17) 1.0196(5) 0.6553(2) 0.0429(11) Uani 0.690(2) 1 d PD A 1 
C10A C 0.47514(16) 0.9563(4) 0.5893(2) 0.0405(8) Uani 0.690(2) 1 d PD A 1 
H10A H 0.4947 0.9555 0.5542 0.049 Uiso 0.690(2) 1 calc PR A 1 
C11A C 0.45533(16) 0.7896(4) 0.5962(2) 0.0407(9) Uani 0.690(2) 1 d PD A 1 
H11A H 0.4342 0.7944 0.6296 0.049 Uiso 0.690(2) 1 calc PR A 1 
C12A C 0.5038(2) 0.6806(6) 0.6257(3) 0.0407(11) Uani 0.690(2) 1 d PD A 1 
H12C H 0.5215 0.6577 0.5904 0.049 Uiso 0.690(2) 1 calc PR A 1 
H12D H 0.4900 0.5796 0.6382 0.049 Uiso 0.690(2) 1 calc PR A 1 
O3A O 0.39246(13) 1.0909(4) 0.59365(17) 0.0561(7) Uani 0.690(2) 1 d PD A 1 
O4A O 0.42784(14) 1.1446(4) 0.5114(2) 0.0582(8) Uani 0.690(2) 1 d PD A 1 
C13A C 0.4262(3) 1.0698(7) 0.5660(3) 0.0461(11) Uani 0.690(2) 1 d PD A 1 
C14A C 0.3854(2) 1.2561(6) 0.4794(3) 0.0717(14) Uani 0.690(2) 1 d PD A 1 
H14C H 0.3982 1.3265 0.4493 0.086 Uiso 0.690(2) 1 calc PR A 1 
H14D H 0.3768 1.3218 0.5144 0.086 Uiso 0.690(2) 1 calc PR A 1 
C15A C 0.3309(3) 1.1631(12) 0.4359(5) 0.109(3) Uani 0.690(2) 1 d PD A 1 
H15D H 0.3213 1.0834 0.4646 0.163 Uiso 0.690(2) 1 calc PR A 1 
H15E H 0.3379 1.1113 0.3971 0.163 Uiso 0.690(2) 1 calc PR A 1 
H15F H 0.3001 1.2376 0.4193 0.163 Uiso 0.690(2) 1 calc PR A 1 
C16A C 0.38963(8) 0.6608(3) 0.40925(10) 0.0398(7) Uani 0.690(2) 1 d PGD A 1 
H16A H 0.3992 0.6514 0.3686 0.048 Uiso 0.690(2) 1 calc PR A 1 
C17A C 0.42841(8) 0.7167(3) 0.46831(11) 0.0396(10) Uani 0.690(2) 1 d PGD A 1 
H17A H 0.4644 0.7456 0.4680 0.047 Uiso 0.690(2) 1 calc PR A 1 
C18A C 0.41445(10) 0.7304(4) 0.52786(10) 0.0385(9) Uani 0.690(2) 1 d PGD A 1 
C19A C 0.36172(11) 0.6882(4) 0.52834(11) 0.0383(8) Uani 0.690(2) 1 d PGD A 1 
H19A H 0.3522 0.6976 0.5690 0.046 Uiso 0.690(2) 1 calc PR A 1 
C20A C 0.32295(9) 0.6322(4) 0.46927(13) 0.0347(6) Uani 0.690(2) 1 d PGD A 1 
C21A C 0.33690(8) 0.6185(4) 0.40972(11) 0.0328(6) Uani 0.690(2) 1 d PGD A 1 
C22A C 0.29813(10) 0.5626(5) 0.35066(13) 0.0386(6) Uani 0.690(2) 1 d PGD A 1 
H22A H 0.3077 0.5532 0.3100 0.046 Uiso 0.690(2) 1 calc PR A 1 
C23A C 0.24539(10) 0.5203(6) 0.35113(18) 0.0421(6) Uani 0.690(2) 1 d PGD A 1 
C24A C 0.23144(10) 0.5340(6) 0.4107(2) 0.0481(7) Uani 0.690(2) 1 d PGD A 1 
H24A H 0.1954 0.5052 0.4110 0.058 Uiso 0.690(2) 1 calc PR A 1 
C25A C 0.27021(10) 0.5900(5) 0.46974(17) 0.0459(7) Uani 0.690(2) 1 d PGD A 1 
H25A H 0.2607 0.5994 0.5104 0.055 Uiso 0.690(2) 1 calc PR A 1 
C26A C 0.2128(4) 0.4389(14) 0.2344(4) 0.0737(13) Uani 0.690(2) 1 d PD A 1 
H26D H 0.2218 0.5419 0.2192 0.111 Uiso 0.690(2) 1 calc PR A 1 
H26E H 0.1795 0.3967 0.2007 0.111 Uiso 0.690(2) 1 calc PR A 1 
H26F H 0.2438 0.3662 0.2396 0.111 Uiso 0.690(2) 1 calc PR A 1 
O5A O 0.20299(17) 0.4561(5) 0.2980(2) 0.0509(8) Uani 0.690(2) 1 d PD A 1 
O1B O 0.6998(4) 0.3536(11) 0.8631(4) 0.0618(10) Uani 0.310(2) 1 d PD A 2 
H1B H 0.7000 0.2632 0.8464 0.093 Uiso 0.310(2) 1 calc PR A 2 
C1B C 0.6610(3) 0.4453(9) 0.8179(3) 0.0419(10) Uani 0.310(2) 1 d PGD A 2 
C2B C 0.6711(3) 0.6054(10) 0.8134(4) 0.0433(9) Uani 0.310(2) 1 d PGD A 2 
H2B H 0.7059 0.6488 0.8390 0.052 Uiso 0.310(2) 1 calc PR A 2 
C3B C 0.6303(5) 0.7021(9) 0.7715(5) 0.0445(7) Uani 0.310(2) 1 d PGD A 2 
H3B H 0.6373 0.8116 0.7684 0.053 Uiso 0.310(2) 1 calc PR A 2 
C4B C 0.5794(4) 0.6387(12) 0.7341(5) 0.0388(6) Uani 0.310(2) 1 d PGD A 2 
C5B C 0.5693(3) 0.4786(13) 0.7386(5) 0.0406(7) Uani 0.310(2) 1 d PGD A 2 
H5B H 0.5345 0.4352 0.7131 0.049 Uiso 0.310(2) 1 calc PR A 2 
C6B C 0.6101(3) 0.3818(9) 0.7805(4) 0.0427(10) Uani 0.310(2) 1 d PGD A 2 
H6B H 0.6031 0.2724 0.7836 0.051 Uiso 0.310(2) 1 calc PR A 2 
O2B O 0.5047(6) 1.1557(12) 0.6742(7) 0.0603(13) Uani 0.310(2) 1 d PD A 2 
C7B C 0.5377(5) 0.7474(13) 0.6879(7) 0.0390(9) Uani 0.310(2) 1 d PD A 2 
C8B C 0.5388(5) 0.9038(13) 0.7029(7) 0.0418(12) Uani 0.310(2) 1 d PD A 2 
H8B H 0.5669 0.9410 0.7420 0.050 Uiso 0.310(2) 1 calc PR A 2 
C9B C 0.4993(4) 1.0165(12) 0.6623(6) 0.0429(11) Uani 0.310(2) 1 d PD A 2 
C10B C 0.4499(3) 0.9484(9) 0.6067(4) 0.0405(8) Uani 0.310(2) 1 d PD A 2 
H10B H 0.4206 0.9135 0.6264 0.049 Uiso 0.310(2) 1 calc PR A 2 
C11B C 0.4688(4) 0.8080(10) 0.5712(4) 0.0407(9) Uani 0.310(2) 1 d PD A 2 
H11B H 0.4991 0.8451 0.5536 0.049 Uiso 0.310(2) 1 calc PR A 2 
C12B C 0.4927(6) 0.6847(14) 0.6268(6) 0.0407(11) Uani 0.310(2) 1 d PD A 2 
H12A H 0.4622 0.6428 0.6422 0.049 Uiso 0.310(2) 1 calc PR A 2 
H12B H 0.5078 0.5959 0.6071 0.049 Uiso 0.310(2) 1 calc PR A 2 
O3B O 0.4452(4) 1.1183(11) 0.5086(4) 0.0561(7) Uani 0.310(2) 1 d PD A 2 
O4B O 0.3789(3) 1.1336(9) 0.5564(4) 0.0582(8) Uani 0.310(2) 1 d PD A 2 
C13B C 0.4269(6) 1.0753(16) 0.5519(7) 0.0461(11) Uani 0.310(2) 1 d PD A 2 
C14B C 0.3555(5) 1.2445(14) 0.5009(6) 0.0717(14) Uani 0.310(2) 1 d PD A 2 
H14A H 0.3783 1.3417 0.5096 0.086 Uiso 0.310(2) 1 calc PR A 2 
H14B H 0.3177 1.2738 0.5004 0.086 Uiso 0.310(2) 1 calc PR A 2 
C15B C 0.3526(8) 1.176(3) 0.4283(8) 0.109(3) Uani 0.310(2) 1 d PD A 2 
H15A H 0.3373 1.0691 0.4234 0.163 Uiso 0.310(2) 1 calc PR A 2 
H15B H 0.3900 1.1733 0.4241 0.163 Uiso 0.310(2) 1 calc PR A 2 
H15C H 0.3289 1.2439 0.3926 0.163 Uiso 0.310(2) 1 calc PR A 2 
C16B C 0.3885(2) 0.6558(9) 0.3920(3) 0.0398(7) Uani 0.310(2) 1 d PGD A 2 
H16B H 0.3947 0.6439 0.3494 0.048 Uiso 0.310(2) 1 calc PR A 2 
C17B C 0.4304(2) 0.7137(9) 0.4477(3) 0.0396(10) Uani 0.310(2) 1 d PGD A 2 
H17B H 0.4653 0.7413 0.4431 0.047 Uiso 0.310(2) 1 calc PR A 2 
C18B C 0.4213(3) 0.7310(11) 0.5102(3) 0.0385(9) Uani 0.310(2) 1 d PGD A 2 
C19B C 0.3703(3) 0.6906(11) 0.5169(3) 0.0383(8) Uani 0.310(2) 1 d PGD A 2 
H19B H 0.3641 0.7025 0.5596 0.046 Uiso 0.310(2) 1 calc PR A 2 
C20B C 0.3283(2) 0.6327(10) 0.4612(3) 0.0347(6) Uani 0.310(2) 1 d PGD A 2 
C21B C 0.3374(2) 0.6153(9) 0.3988(3) 0.0328(6) Uani 0.310(2) 1 d PGD A 2 
C22B C 0.2955(3) 0.5575(12) 0.3431(3) 0.0386(6) Uani 0.310(2) 1 d PGD A 2 
H22B H 0.3017 0.5456 0.3004 0.046 Uiso 0.310(2) 1 calc PR A 2 
C23B C 0.2445(3) 0.5170(15) 0.3498(5) 0.0421(6) Uani 0.310(2) 1 d PGD A 2 
C24B C 0.2354(3) 0.5344(15) 0.4122(5) 0.0481(7) Uani 0.310(2) 1 d PGD A 2 
H24B H 0.2005 0.5068 0.4168 0.058 Uiso 0.310(2) 1 calc PR A 2 
C25B C 0.2773(3) 0.5923(13) 0.4679(4) 0.0459(7) Uani 0.310(2) 1 d PGD A 2 
H25B H 0.2711 0.6041 0.5106 0.055 Uiso 0.310(2) 1 calc PR A 2 
C26B C 0.2063(10) 0.437(3) 0.2344(8) 0.0737(13) Uani 0.310(2) 1 d PD A 2 
H26A H 0.2153 0.5314 0.2127 0.111 Uiso 0.310(2) 1 calc PR A 2 
H26B H 0.1727 0.3878 0.2040 0.111 Uiso 0.310(2) 1 calc PR A 2 
H26C H 0.2371 0.3620 0.2439 0.111 Uiso 0.310(2) 1 calc PR A 2 
O5B O 0.1971(4) 0.4801(15) 0.2967(6) 0.0509(8) Uani 0.310(2) 1 d PD A 2 
 
loop_ 
 _atom_site_aniso_label 
 _atom_site_aniso_U_11 
 _atom_site_aniso_U_22 
 _atom_site_aniso_U_33 
 _atom_site_aniso_U_23 
 _atom_site_aniso_U_13 
 _atom_site_aniso_U_12 
O1A 0.072(2) 0.0520(16) 0.050(2) -0.0002(15) 0.0031(15) 0.0120(16) 
C1A 0.050(2) 0.0447(17) 0.0339(19) -0.0009(15) 0.0167(15) 0.0054(15) 
C2A 0.0443(15) 0.053(2) 0.0304(19) 0.0012(15) 0.0084(13) -0.0043(14) 
C3A 0.0481(16) 0.0463(17) 0.0364(15) 0.0012(13) 0.0096(13) -0.0117(14) 
C4A 0.0399(14) 0.0424(14) 0.0340(12) -0.0039(10) 0.0115(10) -0.0047(11) 
C5A 0.0429(13) 0.0406(14) 0.0392(13) -0.0090(11) 0.0141(11) -0.0041(11) 
C6A 0.054(2) 0.0367(14) 0.0415(19) -0.0049(13) 0.0210(16) -0.0010(15) 
O2A 0.080(3) 0.0338(11) 0.0626(18) -0.0052(11) 0.0159(18) -0.0194(14) 
C7A 0.037(2) 0.0418(14) 0.0405(13) -0.0026(11) 0.0158(14) -0.0118(13) 
C8A 0.040(2) 0.0436(15) 0.0432(15) -0.0046(12) 0.0151(17) -0.0159(15) 
C9A 0.048(3) 0.0335(14) 0.0493(18) -0.0031(13) 0.0175(18) -0.0153(17) 
C10A 0.0405(19) 0.0341(16) 0.0464(19) 0.0002(14) 0.0130(15) -0.0054(15) 
C11A 0.043(2) 0.0347(17) 0.041(2) -0.0018(16) 0.0077(15) -0.0042(15) 
C12A 0.044(2) 0.0335(13) 0.0402(13) -0.0030(11) 0.0072(15) -0.0063(15) 
O3A 0.0592(16) 0.0522(17) 0.0596(16) -0.0071(14) 0.0227(14) -0.0164(14) 
O4A 0.0492(15) 0.0546(18) 0.0787(19) 0.0186(15) 0.0312(15) 0.0137(14) 
C13A 0.0512(16) 0.0298(13) 0.056(3) -0.0018(16) 0.0151(18) -0.0103(12) 
C14A 0.068(3) 0.056(3) 0.088(3) 0.032(2) 0.019(2) 0.012(2) 
C15A 0.069(5) 0.112(5) 0.120(5) 0.034(4) -0.007(4) 0.023(5) 
C16A 0.0453(14) 0.0442(15) 0.0329(18) -0.0012(14) 0.0169(13) -0.0014(12) 
C17A 0.0359(14) 0.0405(15) 0.044(3) -0.0040(17) 0.0148(15) -0.0027(12) 
C18A 0.0408(17) 0.0300(13) 0.040(2) -0.0072(15) 0.0063(15) 0.0026(12) 
C19A 0.0475(18) 0.0385(14) 0.0321(15) -0.0027(13) 0.0169(13) 0.0040(13) 
C20A 0.0392(13) 0.0297(12) 0.0378(14) -0.0021(11) 0.0160(11) -0.0005(11) 
C21A 0.0377(12) 0.0271(11) 0.0325(14) 0.0006(10) 0.0096(10) 0.0034(9) 
C22A 0.0446(13) 0.0326(12) 0.0368(14) -0.0012(11) 0.0102(11) 0.0048(11) 
C23A 0.0369(12) 0.0298(12) 0.0508(15) -0.0047(11) 0.0014(11) 0.0030(10) 
C24A 0.0354(13) 0.0455(15) 0.0642(17) -0.0024(13) 0.0168(12) -0.0042(12) 
C25A 0.0465(16) 0.0487(16) 0.0482(15) -0.0034(13) 0.0230(13) -0.0019(14) 
C26A 0.067(3) 0.074(2) 0.063(2) -0.0313(18) -0.0047(18) 0.005(2) 
O5A 0.0397(13) 0.0371(17) 0.0610(12) -0.0130(11) -0.0056(10) 0.0073(11) 
O1B 0.072(2) 0.0520(16) 0.050(2) -0.0002(15) 0.0031(15) 0.0120(16) 
C1B 0.050(2) 0.0447(17) 0.0339(19) -0.0009(15) 0.0167(15) 0.0054(15) 
C2B 0.0443(15) 0.053(2) 0.0304(19) 0.0012(15) 0.0084(13) -0.0043(14) 
C3B 0.0481(16) 0.0463(17) 0.0364(15) 0.0012(13) 0.0096(13) -0.0117(14) 
C4B 0.0399(14) 0.0424(14) 0.0340(12) -0.0039(10) 0.0115(10) -0.0047(11) 
C5B 0.0429(13) 0.0406(14) 0.0392(13) -0.0090(11) 0.0141(11) -0.0041(11) 
C6B 0.054(2) 0.0367(14) 0.0415(19) -0.0049(13) 0.0210(16) -0.0010(15) 
O2B 0.080(3) 0.0338(11) 0.0626(18) -0.0052(11) 0.0159(18) -0.0194(14) 
C7B 0.037(2) 0.0418(14) 0.0405(13) -0.0026(11) 0.0158(14) -0.0118(13) 
C8B 0.040(2) 0.0436(15) 0.0432(15) -0.0046(12) 0.0151(17) -0.0159(15) 
C9B 0.048(3) 0.0335(14) 0.0493(18) -0.0031(13) 0.0175(18) -0.0153(17) 
C10B 0.0405(19) 0.0341(16) 0.0464(19) 0.0002(14) 0.0130(15) -0.0054(15) 
C11B 0.043(2) 0.0347(17) 0.041(2) -0.0018(16) 0.0077(15) -0.0042(15) 
C12B 0.044(2) 0.0335(13) 0.0402(13) -0.0030(11) 0.0072(15) -0.0063(15) 
O3B 0.0592(16) 0.0522(17) 0.0596(16) -0.0071(14) 0.0227(14) -0.0164(14) 
O4B 0.0492(15) 0.0546(18) 0.0787(19) 0.0186(15) 0.0312(15) 0.0137(14) 
C13B 0.0512(16) 0.0298(13) 0.056(3) -0.0018(16) 0.0151(18) -0.0103(12) 
C14B 0.068(3) 0.056(3) 0.088(3) 0.032(2) 0.019(2) 0.012(2) 
C15B 0.069(5) 0.112(5) 0.120(5) 0.034(4) -0.007(4) 0.023(5) 
C16B 0.0453(14) 0.0442(15) 0.0329(18) -0.0012(14) 0.0169(13) -0.0014(12) 
C17B 0.0359(14) 0.0405(15) 0.044(3) -0.0040(17) 0.0148(15) -0.0027(12) 
C18B 0.0408(17) 0.0300(13) 0.040(2) -0.0072(15) 0.0063(15) 0.0026(12) 
C19B 0.0475(18) 0.0385(14) 0.0321(15) -0.0027(13) 0.0169(13) 0.0040(13) 
C20B 0.0392(13) 0.0297(12) 0.0378(14) -0.0021(11) 0.0160(11) -0.0005(11) 
C21B 0.0377(12) 0.0271(11) 0.0325(14) 0.0006(10) 0.0096(10) 0.0034(9) 
C22B 0.0446(13) 0.0326(12) 0.0368(14) -0.0012(11) 0.0102(11) 0.0048(11) 
C23B 0.0369(12) 0.0298(12) 0.0508(15) -0.0047(11) 0.0014(11) 0.0030(10) 
C24B 0.0354(13) 0.0455(15) 0.0642(17) -0.0024(13) 0.0168(12) -0.0042(12) 
C25B 0.0465(16) 0.0487(16) 0.0482(15) -0.0034(13) 0.0230(13) -0.0019(14) 
C26B 0.067(3) 0.074(2) 0.063(2) -0.0313(18) -0.0047(18) 0.005(2) 
O5B 0.0397(13) 0.0371(17) 0.0610(12) -0.0130(11) -0.0056(10) 0.0073(11) 
 
_geom_special_details 
; 
 All esds (except the esd in the dihedral angle between two l.s. planes) 
 are estimated using the full covariance matrix.  The cell esds are taken 
 into account individually in the estimation of esds in distances, angles 
 and torsion angles; correlations between esds in cell parameters are only 
 used when they are defined by crystal symmetry.  An approximate (isotropic) 
 treatment of cell esds is used for estimating esds involving l.s. planes. 
; 
 
loop_ 
 _geom_bond_atom_site_label_1 
 _geom_bond_atom_site_label_2 
 _geom_bond_distance 
 _geom_bond_site_symmetry_2 
 _geom_bond_publ_flag 
O1A C1A 1.368(4) . ? 
O1A H1A 0.8400 . ? 
C1A C2A 1.3900 . ? 
C1A C6A 1.3900 . ? 
C2A C3A 1.3900 . ? 
C2A H2A 0.9500 . ? 
C3A C4A 1.3900 . ? 
C3A H3A 0.9500 . ? 
C4A C5A 1.3900 . ? 
C4A C7A 1.500(5) . ? 
C5A C6A 1.3900 . ? 
C5A H5A 0.9500 . ? 
C6A H6A 0.9500 . ? 
O2A C9A 1.215(5) . ? 
C7A C8A 1.356(6) . ? 
C7A C12A 1.513(6) . ? 
C8A C9A 1.439(6) . ? 
C8A H8A 0.9500 . ? 
C9A C10A 1.518(5) . ? 
C10A C11A 1.521(5) . ? 
C10A C13A 1.526(6) . ? 
C10A H10A 1.0000 . ? 
C11A C12A 1.507(6) . ? 
C11A C18A 1.551(4) . ? 
C11A H11A 1.0000 . ? 
C12A H12C 0.9900 . ? 
C12A H12D 0.9900 . ? 
O3A C13A 1.184(8) . ? 
O4A C13A 1.307(7) . ? 
O4A C14A 1.431(6) . ? 
C14A C15A 1.601(9) . ? 
C14A H14C 0.9900 . ? 
C14A H14D 0.9900 . ? 
C15A H15D 0.9800 . ? 
C15A H15E 0.9800 . ? 
C15A H15F 0.9800 . ? 
C16A C17A 1.3900 . ? 
C16A C21A 1.3900 . ? 
C16A H16A 0.9500 . ? 
C17A C18A 1.3900 . ? 
C17A H17A 0.9500 . ? 
C18A C19A 1.3900 . ? 
C19A C20A 1.3900 . ? 
C19A H19A 0.9500 . ? 
C20A C21A 1.3900 . ? 
C20A C25A 1.3900 . ? 
C21A C22A 1.3900 . ? 
C22A C23A 1.3900 . ? 
C22A H22A 0.9500 . ? 
C23A O5A 1.386(4) . ? 
C23A C24A 1.3900 . ? 
C24A C25A 1.3900 . ? 
C24A H24A 0.9500 . ? 
C25A H25A 0.9500 . ? 
C26A O5A 1.421(7) . ? 
C26A H26D 0.9800 . ? 
C26A H26E 0.9800 . ? 
C26A H26F 0.9800 . ? 
O1B C1B 1.368(9) . ? 
O1B H1B 0.8400 . ? 
C1B C2B 1.3900 . ? 
C1B C6B 1.3900 . ? 
C2B C3B 1.3900 . ? 
C2B H2B 0.9500 . ? 
C3B C4B 1.3900 . ? 
C3B H3B 0.9500 . ? 
C4B C5B 1.3900 . ? 
C4B C7B 1.500(10) . ? 
C5B C6B 1.3900 . ? 
C5B H5B 0.9500 . ? 
C6B H6B 0.9500 . ? 
O2B C9B 1.204(12) . ? 
C7B C8B 1.359(12) . ? 
C7B C12B 1.510(12) . ? 
C8B C9B 1.447(12) . ? 
C8B H8B 0.9500 . ? 
C9B C10B 1.524(11) . ? 
C10B C13B 1.538(12) . ? 
C10B C11B 1.552(11) . ? 
C10B H10B 1.0000 . ? 
C11B C12B 1.532(12) . ? 
C11B C18B 1.587(8) . ? 
C11B H11B 1.0000 . ? 
C12B H12A 0.9900 . ? 
C12B H12B 0.9900 . ? 
O3B C13B 1.189(17) . ? 
O4B C13B 1.348(15) . ? 
O4B C14B 1.458(11) . ? 
C14B C15B 1.591(16) . ? 
C14B H14A 0.9900 . ? 
C14B H14B 0.9900 . ? 
C15B H15A 0.9800 . ? 
C15B H15B 0.9800 . ? 
C15B H15C 0.9800 . ? 
C16B C17B 1.3900 . ? 
C16B C21B 1.3900 . ? 
C16B H16B 0.9500 . ? 
C17B C18B 1.3900 . ? 
C17B H17B 0.9500 . ? 
C18B C19B 1.3900 . ? 
C19B C20B 1.3900 . ? 
C19B H19B 0.9500 . ? 
C20B C21B 1.3900 . ? 
C20B C25B 1.3900 . ? 
C21B C22B 1.3900 . ? 
C22B C23B 1.3900 . ? 
C22B H22B 0.9500 . ? 
C23B O5B 1.386(9) . ? 
C23B C24B 1.3900 . ? 
C24B C25B 1.3900 . ? 
C24B H24B 0.9500 . ? 
C25B H25B 0.9500 . ? 
C26B O5B 1.428(14) . ? 
C26B H26A 0.9800 . ? 
C26B H26B 0.9800 . ? 
C26B H26C 0.9800 . ? 
 
loop_ 
 _geom_angle_atom_site_label_1 
 _geom_angle_atom_site_label_2 
 _geom_angle_atom_site_label_3 
 _geom_angle 
 _geom_angle_site_symmetry_1 
 _geom_angle_site_symmetry_3 
 _geom_angle_publ_flag 
C1A O1A H1A 109.5 . . ? 
O1A C1A C2A 117.3(2) . . ? 
O1A C1A C6A 122.5(2) . . ? 
C2A C1A C6A 120.0 . . ? 
C3A C2A C1A 120.0 . . ? 
C3A C2A H2A 120.0 . . ? 
C1A C2A H2A 120.0 . . ? 
C2A C3A C4A 120.0 . . ? 
C2A C3A H3A 120.0 . . ? 
C4A C3A H3A 120.0 . . ? 
C5A C4A C3A 120.0 . . ? 
C5A C4A C7A 120.0(3) . . ? 
C3A C4A C7A 119.8(3) . . ? 
C4A C5A C6A 120.0 . . ? 
C4A C5A H5A 120.0 . . ? 
C6A C5A H5A 120.0 . . ? 
C5A C6A C1A 120.0 . . ? 
C5A C6A H6A 120.0 . . ? 
C1A C6A H6A 120.0 . . ? 
C8A C7A C4A 121.6(4) . . ? 
C8A C7A C12A 120.6(4) . . ? 
C4A C7A C12A 117.8(4) . . ? 
C7A C8A C9A 124.0(4) . . ? 
C7A C8A H8A 118.0 . . ? 
C9A C8A H8A 118.0 . . ? 
O2A C9A C8A 123.5(4) . . ? 
O2A C9A C10A 120.2(4) . . ? 
C8A C9A C10A 116.0(4) . . ? 
C9A C10A C11A 112.9(3) . . ? 
C9A C10A C13A 107.8(4) . . ? 
C11A C10A C13A 110.7(4) . . ? 
C9A C10A H10A 108.4 . . ? 
C11A C10A H10A 108.4 . . ? 
C13A C10A H10A 108.4 . . ? 
C12A C11A C10A 110.8(4) . . ? 
C12A C11A C18A 113.5(3) . . ? 
C10A C11A C18A 111.2(3) . . ? 
C12A C11A H11A 107.0 . . ? 
C10A C11A H11A 107.0 . . ? 
C18A C11A H11A 107.0 . . ? 
C11A C12A C7A 113.3(4) . . ? 
C11A C12A H12C 108.9 . . ? 
C7A C12A H12C 108.9 . . ? 
C11A C12A H12D 108.9 . . ? 
C7A C12A H12D 108.9 . . ? 
H12C C12A H12D 107.7 . . ? 
C13A O4A C14A 119.7(4) . . ? 
O3A C13A O4A 124.7(5) . . ? 
O3A C13A C10A 125.8(5) . . ? 
O4A C13A C10A 109.5(5) . . ? 
O4A C14A C15A 109.2(5) . . ? 
O4A C14A H14C 109.8 . . ? 
C15A C14A H14C 109.8 . . ? 
O4A C14A H14D 109.8 . . ? 
C15A C14A H14D 109.8 . . ? 
H14C C14A H14D 108.3 . . ? 
C17A C16A C21A 120.0 . . ? 
C17A C16A H16A 120.0 . . ? 
C21A C16A H16A 120.0 . . ? 
C18A C17A C16A 120.0 . . ? 
C18A C17A H17A 120.0 . . ? 
C16A C17A H17A 120.0 . . ? 
C17A C18A C19A 120.0 . . ? 
C17A C18A C11A 123.4(2) . . ? 
C19A C18A C11A 116.6(2) . . ? 
C18A C19A C20A 120.0 . . ? 
C18A C19A H19A 120.0 . . ? 
C20A C19A H19A 120.0 . . ? 
C21A C20A C19A 120.0 . . ? 
C21A C20A C25A 120.0 . . ? 
C19A C20A C25A 120.0 . . ? 
C20A C21A C22A 120.0 . . ? 
C20A C21A C16A 120.0 . . ? 
C22A C21A C16A 120.0 . . ? 
C23A C22A C21A 120.0 . . ? 
C23A C22A H22A 120.0 . . ? 
C21A C22A H22A 120.0 . . ? 
O5A C23A C24A 112.6(3) . . ? 
O5A C23A C22A 127.3(3) . . ? 
C24A C23A C22A 120.0 . . ? 
C23A C24A C25A 120.0 . . ? 
C23A C24A H24A 120.0 . . ? 
C25A C24A H24A 120.0 . . ? 
C24A C25A C20A 120.0 . . ? 
C24A C25A H25A 120.0 . . ? 
C20A C25A H25A 120.0 . . ? 
C23A O5A C26A 117.1(5) . . ? 
C1B O1B H1B 109.5 . . ? 
O1B C1B C2B 119.4(6) . . ? 
O1B C1B C6B 120.4(6) . . ? 
C2B C1B C6B 120.0 . . ? 
C3B C2B C1B 120.0 . . ? 
C3B C2B H2B 120.0 . . ? 
C1B C2B H2B 120.0 . . ? 
C4B C3B C2B 120.0 . . ? 
C4B C3B H3B 120.0 . . ? 
C2B C3B H3B 120.0 . . ? 
C3B C4B C5B 120.0 . . ? 
C3B C4B C7B 117.7(8) . . ? 
C5B C4B C7B 122.3(8) . . ? 
C6B C5B C4B 120.0 . . ? 
C6B C5B H5B 120.0 . . ? 
C4B C5B H5B 120.0 . . ? 
C5B C6B C1B 120.0 . . ? 
C5B C6B H6B 120.0 . . ? 
C1B C6B H6B 120.0 . . ? 
C8B C7B C4B 119.6(9) . . ? 
C8B C7B C12B 119.3(9) . . ? 
C4B C7B C12B 121.0(9) . . ? 
C7B C8B C9B 123.4(10) . . ? 
C7B C8B H8B 118.3 . . ? 
C9B C8B H8B 118.3 . . ? 
O2B C9B C8B 121.0(11) . . ? 
O2B C9B C10B 122.6(10) . . ? 
C8B C9B C10B 116.4(8) . . ? 
C9B C10B C13B 108.9(8) . . ? 
C9B C10B C11B 110.1(7) . . ? 
C13B C10B C11B 106.8(8) . . ? 
C9B C10B H10B 110.3 . . ? 
C13B C10B H10B 110.3 . . ? 
C11B C10B H10B 110.3 . . ? 
C12B C11B C10B 105.9(8) . . ? 
C12B C11B C18B 109.9(7) . . ? 
C10B C11B C18B 114.9(7) . . ? 
C12B C11B H11B 108.7 . . ? 
C10B C11B H11B 108.7 . . ? 
C18B C11B H11B 108.7 . . ? 
C7B C12B C11B 113.9(9) . . ? 
C7B C12B H12A 108.8 . . ? 
C11B C12B H12A 108.8 . . ? 
C7B C12B H12B 108.8 . . ? 
C11B C12B H12B 108.8 . . ? 
H12A C12B H12B 107.7 . . ? 
C13B O4B C14B 109.6(9) . . ? 
O3B C13B O4B 121.1(10) . . ? 
O3B C13B C10B 128.4(11) . . ? 
O4B C13B C10B 110.4(11) . . ? 
O4B C14B C15B 113.3(11) . . ? 
O4B C14B H14A 108.9 . . ? 
C15B C14B H14A 108.9 . . ? 
O4B C14B H14B 108.9 . . ? 
C15B C14B H14B 108.9 . . ? 
H14A C14B H14B 107.7 . . ? 
C14B C15B H15A 109.5 . . ? 
C14B C15B H15B 109.5 . . ? 
H15A C15B H15B 109.5 . . ? 
C14B C15B H15C 109.5 . . ? 
H15A C15B H15C 109.5 . . ? 
H15B C15B H15C 109.5 . . ? 
C17B C16B C21B 120.0 . . ? 
C17B C16B H16B 120.0 . . ? 
C21B C16B H16B 120.0 . . ? 
C16B C17B C18B 120.0 . . ? 
C16B C17B H17B 120.0 . . ? 
C18B C17B H17B 120.0 . . ? 
C17B C18B C19B 120.0 . . ? 
C17B C18B C11B 118.4(5) . . ? 
C19B C18B C11B 121.5(5) . . ? 
C20B C19B C18B 120.0 . . ? 
C20B C19B H19B 120.0 . . ? 
C18B C19B H19B 120.0 . . ? 
C19B C20B C21B 120.0 . . ? 
C19B C20B C25B 120.0 . . ? 
C21B C20B C25B 120.0 . . ? 
C22B C21B C20B 120.0 . . ? 
C22B C21B C16B 120.0 . . ? 
C20B C21B C16B 120.0 . . ? 
C23B C22B C21B 120.0 . . ? 
C23B C22B H22B 120.0 . . ? 
C21B C22B H22B 120.0 . . ? 
O5B C23B C22B 125.6(7) . . ? 
O5B C23B C24B 113.8(7) . . ? 
C22B C23B C24B 120.0 . . ? 
C25B C24B C23B 120.0 . . ? 
C25B C24B H24B 120.0 . . ? 
C23B C24B H24B 120.0 . . ? 
C24B C25B C20B 120.0 . . ? 
C24B C25B H25B 120.0 . . ? 
C20B C25B H25B 120.0 . . ? 
O5B C26B H26A 109.5 . . ? 
O5B C26B H26B 109.5 . . ? 
H26A C26B H26B 109.5 . . ? 
O5B C26B H26C 109.5 . . ? 
H26A C26B H26C 109.5 . . ? 
H26B C26B H26C 109.5 . . ? 
C23B O5B C26B 115.2(12) . . ? 
 
loop_ 
 _geom_torsion_atom_site_label_1 
 _geom_torsion_atom_site_label_2 
 _geom_torsion_atom_site_label_3 
 _geom_torsion_atom_site_label_4 
 _geom_torsion 
 _geom_torsion_site_symmetry_1 
 _geom_torsion_site_symmetry_2 
 _geom_torsion_site_symmetry_3 
 _geom_torsion_site_symmetry_4 
 _geom_torsion_publ_flag 
O1A C1A C2A C3A -175.8(3) . . . . ? 
C6A C1A C2A C3A 0.0 . . . . ? 
C1A C2A C3A C4A 0.0 . . . . ? 
C2A C3A C4A C5A 0.0 . . . . ? 
C2A C3A C4A C7A 175.1(5) . . . . ? 
C3A C4A C5A C6A 0.0 . . . . ? 
C7A C4A C5A C6A -175.1(5) . . . . ? 
C4A C5A C6A C1A 0.0 . . . . ? 
O1A C1A C6A C5A 175.6(3) . . . . ? 
C2A C1A C6A C5A 0.0 . . . . ? 
C5A C4A C7A C8A 150.1(5) . . . . ? 
C3A C4A C7A C8A -25.0(7) . . . . ? 
C5A C4A C7A C12A -28.9(7) . . . . ? 
C3A C4A C7A C12A 156.0(4) . . . . ? 
C4A C7A C8A C9A -178.3(5) . . . . ? 
C12A C7A C8A C9A 0.6(9) . . . . ? 
C7A C8A C9A O2A 179.4(6) . . . . ? 
C7A C8A C9A C10A -6.5(7) . . . . ? 
O2A C9A C10A C11A -152.5(4) . . . . ? 
C8A C9A C10A C11A 33.2(5) . . . . ? 
O2A C9A C10A C13A -29.9(6) . . . . ? 
C8A C9A C10A C13A 155.9(4) . . . . ? 
C9A C10A C11A C12A -53.5(5) . . . . ? 
C13A C10A C11A C12A -174.5(4) . . . . ? 
C9A C10A C11A C18A 179.3(3) . . . . ? 
C13A C10A C11A C18A 58.3(5) . . . . ? 
C10A C11A C12A C7A 47.3(6) . . . . ? 
C18A C11A C12A C7A 173.2(4) . . . . ? 
C8A C7A C12A C11A -21.9(8) . . . . ? 
C4A C7A C12A C11A 157.1(5) . . . . ? 
C14A O4A C13A O3A -2.8(9) . . . . ? 
C14A O4A C13A C10A 178.9(4) . . . . ? 
C9A C10A C13A O3A -67.9(7) . . . . ? 
C11A C10A C13A O3A 56.1(7) . . . . ? 
C9A C10A C13A O4A 110.3(5) . . . . ? 
C11A C10A C13A O4A -125.7(5) . . . . ? 
C13A O4A C14A C15A -77.9(7) . . . . ? 
C21A C16A C17A C18A 0.0 . . . . ? 
C16A C17A C18A C19A 0.0 . . . . ? 
C16A C17A C18A C11A 179.2(3) . . . . ? 
C12A C11A C18A C17A -65.7(4) . . . . ? 
C10A C11A C18A C17A 60.1(4) . . . . ? 
C12A C11A C18A C19A 113.5(4) . . . . ? 
C10A C11A C18A C19A -120.7(3) . . . . ? 
C17A C18A C19A C20A 0.0 . . . . ? 
C11A C18A C19A C20A -179.2(3) . . . . ? 
C18A C19A C20A C21A 0.0 . . . . ? 
C18A C19A C20A C25A 180.0 . . . . ? 
C19A C20A C21A C22A 180.0 . . . . ? 
C25A C20A C21A C22A 0.0 . . . . ? 
C19A C20A C21A C16A 0.0 . . . . ? 
C25A C20A C21A C16A 180.0 . . . . ? 
C17A C16A C21A C20A 0.0 . . . . ? 
C17A C16A C21A C22A 180.0 . . . . ? 
C20A C21A C22A C23A 0.0 . . . . ? 
C16A C21A C22A C23A 180.0 . . . . ? 
C21A C22A C23A O5A -176.8(4) . . . . ? 
C21A C22A C23A C24A 0.0 . . . . ? 
O5A C23A C24A C25A 177.2(4) . . . . ? 
C22A C23A C24A C25A 0.0 . . . . ? 
C23A C24A C25A C20A 0.0 . . . . ? 
C21A C20A C25A C24A 0.0 . . . . ? 
C19A C20A C25A C24A 180.0 . . . . ? 
C24A C23A O5A C26A 179.2(6) . . . . ? 
C22A C23A O5A C26A -3.8(8) . . . . ? 
O1B C1B C2B C3B -175.1(8) . . . . ? 
C6B C1B C2B C3B 0.0 . . . . ? 
C1B C2B C3B C4B 0.0 . . . . ? 
C2B C3B C4B C5B 0.0 . . . . ? 
C2B C3B C4B C7B -177.8(11) . . . . ? 
C3B C4B C5B C6B 0.0 . . . . ? 
C7B C4B C5B C6B 177.7(12) . . . . ? 
C4B C5B C6B C1B 0.0 . . . . ? 
O1B C1B C6B C5B 175.1(8) . . . . ? 
C2B C1B C6B C5B 0.0 . . . . ? 
C3B C4B C7B C8B -28(2) . . . . ? 
C5B C4B C7B C8B 154.5(13) . . . . ? 
C3B C4B C7B C12B 155.6(12) . . . . ? 
C5B C4B C7B C12B -22(2) . . . . ? 
C4B C7B C8B C9B -178.2(14) . . . . ? 
C12B C7B C8B C9B -1(3) . . . . ? 
C7B C8B C9B O2B -173.6(17) . . . . ? 
C7B C8B C9B C10B 9(2) . . . . ? 
O2B C9B C10B C13B 26.1(17) . . . . ? 
C8B C9B C10B C13B -156.7(12) . . . . ? 
O2B C9B C10B C11B 142.9(13) . . . . ? 
C8B C9B C10B C11B -39.9(14) . . . . ? 
C9B C10B C11B C12B 60.8(10) . . . . ? 
C13B C10B C11B C12B 178.8(10) . . . . ? 
C9B C10B C11B C18B -177.8(8) . . . . ? 
C13B C10B C11B C18B -59.7(10) . . . . ? 
C8B C7B C12B C11B 26(2) . . . . ? 
C4B C7B C12B C11B -157.3(13) . . . . ? 
C10B C11B C12B C7B -54.4(15) . . . . ? 
C18B C11B C12B C7B -179.1(12) . . . . ? 
C14B O4B C13B O3B 2.0(18) . . . . ? 
C14B O4B C13B C10B -175.6(10) . . . . ? 
C9B C10B C13B O3B 76.5(17) . . . . ? 
C11B C10B C13B O3B -42.3(18) . . . . ? 
C9B C10B C13B O4B -106.0(12) . . . . ? 
C11B C10B C13B O4B 135.1(10) . . . . ? 
C13B O4B C14B C15B 49.8(16) . . . . ? 
C21B C16B C17B C18B 0.0 . . . . ? 
C16B C17B C18B C19B 0.0 . . . . ? 
C16B C17B C18B C11B -176.0(6) . . . . ? 
C12B C11B C18B C17B -113.0(9) . . . . ? 
C10B C11B C18B C17B 127.7(7) . . . . ? 
C12B C11B C18B C19B 71.1(10) . . . . ? 
C10B C11B C18B C19B -48.2(9) . . . . ? 
C17B C18B C19B C20B 0.0 . . . . ? 
C11B C18B C19B C20B 175.9(7) . . . . ? 
C18B C19B C20B C21B 0.0 . . . . ? 
C18B C19B C20B C25B 180.0 . . . . ? 
C19B C20B C21B C22B 180.0 . . . . ? 
C25B C20B C21B C22B 0.0 . . . . ? 
C19B C20B C21B C16B 0.0 . . . . ? 
C25B C20B C21B C16B 180.0 . . . . ? 
C17B C16B C21B C22B 180.0 . . . . ? 
C17B C16B C21B C20B 0.0 . . . . ? 
C20B C21B C22B C23B 0.0 . . . . ? 
C16B C21B C22B C23B 180.0 . . . . ? 
C21B C22B C23B O5B 170.2(11) . . . . ? 
C21B C22B C23B C24B 0.0 . . . . ? 
O5B C23B C24B C25B -171.3(10) . . . . ? 
C22B C23B C24B C25B 0.0 . . . . ? 
C23B C24B C25B C20B 0.0 . . . . ? 
C19B C20B C25B C24B 180.0 . . . . ? 
C21B C20B C25B C24B 0.0 . . . . ? 
C22B C23B O5B C26B 19(2) . . . . ? 
C24B C23B O5B C26B -170.5(15) . . . . ? 

loop_ 
 _geom_hbond_atom_site_label_D 
 _geom_hbond_atom_site_label_H 
 _geom_hbond_atom_site_label_A 
 _geom_hbond_distance_DH 
 _geom_hbond_distance_HA 
 _geom_hbond_distance_DA 
 _geom_hbond_angle_DHA 
 _geom_hbond_site_symmetry_A 
O1A H1A O5A  0.84 2.44 3.219(7) 153.8 8_556 
O1B H1B O5B  0.84 2.30 3.135(16) 177.4 8_556 
O2B H2B1 O2B  0.84 2.55 3.36(3) 162.1 2_656
 
_diffrn_measured_fraction_theta_max    0.984 
_diffrn_reflns_theta_full              67.50 
_diffrn_measured_fraction_theta_full   1.000 
_refine_diff_density_max    0.566 
_refine_diff_density_min   -0.651 
_refine_diff_density_rms    0.060 
