# Supplementary material
Source: MDPI journal article supplement (https://www.mdpi.com/2073-4352/2/3/1239)
Supplement: s2 [file s2]

  
data_shelxl 
  
_audit_creation_method            SHELXL-97 
_chemical_name_systematic 
; 
ethyl 4-(3-bromophenyl)-6-(6-methoxy-2-naphthyl)-2-
oxocyclohex-3-ene-1-carboxylate 
; 
_chemical_name_common             ? 
_chemical_melting_point           ? 
_chemical_formula_moiety          'C26 H23 Br O4' 
_chemical_formula_sum 
 'C26 H23 Br O4' 
_chemical_formula_weight          479.35 
  
loop_ 
 _atom_type_symbol 
 _atom_type_description 
 _atom_type_scat_dispersion_real 
 _atom_type_scat_dispersion_imag 
 _atom_type_scat_source 
 'C'  'C'   0.0033   0.0016 
 'International Tables Vol C Tables 4.2.6.8 and 6.1.1.4' 
 'H'  'H'   0.0000   0.0000 
 'International Tables Vol C Tables 4.2.6.8 and 6.1.1.4' 
 'O'  'O'   0.0106   0.0060 
 'International Tables Vol C Tables 4.2.6.8 and 6.1.1.4' 
 'Br'  'Br'  -0.2901   2.4595 
 'International Tables Vol C Tables 4.2.6.8 and 6.1.1.4' 
  
_symmetry_cell_setting            monoclinic 
_symmetry_space_group_name_H-M    'P 21/c'
_symmetry_space_group_name_Hall    '-P 2yc' 
  
loop_ 
 _symmetry_equiv_pos_as_xyz 
 'x, y, z' 
 '-x, y+1/2, -z+1/2' 
 '-x, -y, -z' 
 'x, -y-1/2, z-1/2' 
  
_cell_length_a                    17.8991(9) 
_cell_length_b                    11.4369(6) 
_cell_length_c                    10.8507(5) 
_cell_angle_alpha                 90.00 
_cell_angle_beta                  92.428(4) 
_cell_angle_gamma                 90.00 
_cell_volume                      2219.25(19) 
_cell_formula_units_Z             4 
_cell_measurement_temperature     295(2) 
_cell_measurement_reflns_used     5255 
_cell_measurement_theta_min       4.8105 
_cell_measurement_theta_max       32.2606 
  
_exptl_crystal_description        plate 
_exptl_crystal_colour             colorless 
_exptl_crystal_size_max           0.51 
_exptl_crystal_size_mid           0.38 
_exptl_crystal_size_min           0.15 
_exptl_crystal_density_meas       ? 
_exptl_crystal_density_diffrn     1.435 
_exptl_crystal_density_method     'not measured' 
_exptl_crystal_F_000              984 
_exptl_absorpt_coefficient_mu     1.882 
_exptl_absorpt_correction_type    multi-scan 
_exptl_absorpt_correction_T_min   0.49947 
_exptl_absorpt_correction_T_max   1.00000 
_exptl_absorpt_process_details     
;
CrysAlis PRO and CrysAlis RED, Oxford Diffraction Ltd., 2007
; 
  
_exptl_special_details 
; 
 ? 
; 
  
_diffrn_ambient_temperature       295(2) 
_diffrn_radiation_wavelength      0.71073 
_diffrn_radiation_type            MoK\a 
_diffrn_radiation_source          'fine-focus sealed tube' 
_diffrn_radiation_monochromator   graphite 
_diffrn_measurement_device_type   'Oxford Diffraction Gemini R' 
_diffrn_measurement_method        '\f and \w scans' 
_diffrn_detector_area_resol_mean  10.5081 
_diffrn_standards_number          ? 
_diffrn_standards_interval_count  ? 
_diffrn_standards_interval_time   ? 
_diffrn_standards_decay_%         ? 
_diffrn_reflns_number             21008 
_diffrn_reflns_av_R_equivalents   0.0638 
_diffrn_reflns_av_sigmaI/netI     0.0941 
_diffrn_reflns_limit_h_min        -26 
_diffrn_reflns_limit_h_max        26 
_diffrn_reflns_limit_k_min        -16 
_diffrn_reflns_limit_k_max        17 
_diffrn_reflns_limit_l_min        -15 
_diffrn_reflns_limit_l_max        16 
_diffrn_reflns_theta_min          5.18 
_diffrn_reflns_theta_max          32.47 
_reflns_number_total              7380 
_reflns_number_gt                 2942 
_reflns_threshold_expression      >2sigma(I) 
  
_computing_data_collection
;
CrysAlis PRO, Oxford Diffraction Ltd., 2007.
;
_computing_cell_refinement
;
CrysAlis RED, Oxford Diffraction Ltd., 2007.
;
_computing_data_reduction
;
CrysAlis RED, Oxford Diffraction Ltd., 2007.

; 
_computing_structure_solution     'SHELXS-97 (Sheldrick, 2008)' 
_computing_structure_refinement   'SHELXL-97 (Sheldrick, 2008)' 
_computing_molecular_graphics     'SHELXTL (Sheldrick, 2008)' 
_computing_publication_material   'SHELXTL (Sheldrick, 2008)' 
  
_refine_special_details 
; 
 Refinement of F^2^ against ALL reflections.  The weighted R-factor wR and 
 goodness of fit S are based on F^2^, conventional R-factors R are based 
 on F, with F set to zero for negative F^2^. The threshold expression of 
 F^2^ > 2sigma(F^2^) is used only for calculating R-factors(gt) etc. and is 
 not relevant to the choice of reflections for refinement.  R-factors based 
 on F^2^ are statistically about twice as large as those based on F, and R- 
 factors based on ALL data will be even larger. 
; 
  
_refine_ls_structure_factor_coef  Fsqd 
_refine_ls_matrix_type            full 
_refine_ls_weighting_scheme       calc 
_refine_ls_weighting_details 
 'calc w=1/[\s^2^(Fo^2^)+(0.0488P)^2^+0.1548P] where P=(Fo^2^+2Fc^2^)/3' 
_atom_sites_solution_primary      direct 
_atom_sites_solution_secondary    difmap 
_atom_sites_solution_hydrogens    geom 
_refine_ls_hydrogen_treatment     constr 
_refine_ls_extinction_method      none 
_refine_ls_extinction_coef        ? 
_refine_ls_number_reflns          7380 
_refine_ls_number_parameters      299 
_refine_ls_number_restraints      10 
_refine_ls_R_factor_all           0.1669 
_refine_ls_R_factor_gt            0.0533 
_refine_ls_wR_factor_ref          0.1456 
_refine_ls_wR_factor_gt           0.1082 
_refine_ls_goodness_of_fit_ref    0.973 
_refine_ls_restrained_S_all       0.972 
_refine_ls_shift/su_max           0.056 
_refine_ls_shift/su_mean          0.002 
  
loop_ 
 _atom_site_label 
 _atom_site_type_symbol 
 _atom_site_fract_x 
 _atom_site_fract_y 
 _atom_site_fract_z 
 _atom_site_U_iso_or_equiv 
 _atom_site_adp_type 
 _atom_site_occupancy 
 _atom_site_symmetry_multiplicity 
 _atom_site_calc_flag 
 _atom_site_refinement_flags 
 _atom_site_disorder_assembly 
 _atom_site_disorder_group 
Br Br 0.61948(2) 0.46558(3) 0.03026(3) 0.07405(17) Uani 1 1 d . . . 
O1 O 0.39083(13) 0.7418(2) 0.6778(2) 0.0779(7) Uani 1 1 d . A . 
O2 O 0.21995(15) 0.7226(2) 0.5565(2) 0.0869(8) Uani 1 1 d . . . 
O3 O 0.24832(14) 0.5900(2) 0.6998(3) 0.0878(7) Uani 1 1 d D . . 
O4 O -0.01295(15) 0.2606(3) 0.0705(3) 0.1117(10) Uani 1 1 d . . . 
C1 C 0.53204(15) 0.6340(2) 0.3307(2) 0.0431(6) Uani 1 1 d . A . 
C2 C 0.54419(15) 0.5564(2) 0.2343(2) 0.0459(7) Uani 1 1 d . . . 
H2A H 0.5110 0.4952 0.2183 0.055 Uiso 1 1 calc R . . 
C3 C 0.60551(16) 0.5704(3) 0.1626(3) 0.0504(7) Uani 1 1 d . . . 
C4 C 0.65631(17) 0.6587(3) 0.1827(3) 0.0592(8) Uani 1 1 d . . . 
H4A H 0.6976 0.6662 0.1341 0.071 Uiso 1 1 calc R . . 
C5 C 0.64425(19) 0.7362(3) 0.2774(3) 0.0672(9) Uani 1 1 d . . . 
H5A H 0.6779 0.7970 0.2926 0.081 Uiso 1 1 calc R . . 
C6 C 0.58316(17) 0.7251(3) 0.3497(3) 0.0561(8) Uani 1 1 d . . . 
H6A H 0.5759 0.7791 0.4122 0.067 Uiso 1 1 calc R . . 
C7 C 0.46535(14) 0.6231(2) 0.4066(2) 0.0400(6) Uani 1 1 d . . . 
C8 C 0.46109(15) 0.6806(2) 0.5137(2) 0.0472(7) Uani 1 1 d . A . 
H8A H 0.5030 0.7215 0.5433 0.057 Uiso 1 1 calc R . . 
C9 C 0.39524(17) 0.6828(3) 0.5856(3) 0.0554(7) Uani 1 1 d . . . 
C10A C 0.33169(19) 0.6000(4) 0.5478(3) 0.0465(9) Uani 0.819(5) 1 d PD A 1 
H10A H 0.3420 0.5230 0.5844 0.056 Uiso 0.819(5) 1 calc PR A 1 
C11A C 0.32580(18) 0.5874(4) 0.4080(3) 0.0428(8) Uani 0.819(5) 1 d PD A 1 
H11A H 0.3146 0.6648 0.3731 0.051 Uiso 0.819(5) 1 calc PR A 1 
C12A C 0.40100(14) 0.5482(2) 0.3603(2) 0.0424(6) Uani 0.819(5) 1 d PD A 1 
H12A H 0.4103 0.4679 0.3855 0.051 Uiso 0.819(5) 1 calc PR A 1 
H12B H 0.3983 0.5502 0.2708 0.051 Uiso 0.819(5) 1 calc PR A 1 
C10B C 0.3204(9) 0.6584(14) 0.4966(16) 0.0465(9) Uani 0.181(5) 1 d PD A 2 
H10B H 0.3099 0.7171 0.4324 0.056 Uiso 0.181(5) 1 calc PR A 2 
C11B C 0.3388(9) 0.5375(14) 0.4507(15) 0.0428(8) Uani 0.181(5) 1 d PD A 2 
H11B H 0.3498 0.4812 0.5171 0.051 Uiso 0.181(5) 1 calc PR A 2 
C12B C 0.40100(14) 0.5482(2) 0.3603(2) 0.0424(6) Uani 0.181(5) 1 d PD A 2 
H12C H 0.4196 0.4706 0.3425 0.051 Uiso 0.181(5) 1 calc PR A 2 
H12D H 0.3804 0.5810 0.2837 0.051 Uiso 0.181(5) 1 calc PR A 2 
C13 C 0.25971(18) 0.6475(3) 0.5978(3) 0.0623(9) Uani 1 1 d . A . 
C14A C 0.1854(3) 0.6220(8) 0.7716(6) 0.107(2) Uani 0.819(5) 1 d PD A 1 
H14A H 0.1986 0.6134 0.8588 0.129 Uiso 0.819(5) 1 calc PR A 1 
H14B H 0.1721 0.7030 0.7561 0.129 Uiso 0.819(5) 1 calc PR A 1 
C15A C 0.1227(5) 0.5477(12) 0.7385(16) 0.134(3) Uani 0.819(5) 1 d PD A 1 
H15A H 0.1044 0.5661 0.6564 0.202 Uiso 0.819(5) 1 calc PR A 1 
H15B H 0.0837 0.5601 0.7952 0.202 Uiso 0.819(5) 1 calc PR A 1 
H15C H 0.1383 0.4674 0.7420 0.202 Uiso 0.819(5) 1 calc PR A 1 
C14B C 0.1728(8) 0.617(3) 0.733(4) 0.107(2) Uani 0.181(5) 1 d PD A 2 
H14C H 0.1723 0.6377 0.8191 0.129 Uiso 0.181(5) 1 calc PR A 2 
H14D H 0.1539 0.6823 0.6842 0.129 Uiso 0.181(5) 1 calc PR A 2 
C15B C 0.126(2) 0.516(7) 0.709(9) 0.134(3) Uani 0.181(5) 1 d PD A 2 
H15D H 0.1553 0.4460 0.7202 0.202 Uiso 0.181(5) 1 calc PR A 2 
H15E H 0.1052 0.5190 0.6265 0.202 Uiso 0.181(5) 1 calc PR A 2 
H15F H 0.0863 0.5154 0.7663 0.202 Uiso 0.181(5) 1 calc PR A 2 
C16 C 0.26297(16) 0.5055(3) 0.3658(3) 0.0547(8) Uani 1 1 d . . . 
C17 C 0.23682(18) 0.4105(3) 0.4363(3) 0.0671(9) Uani 1 1 d . A . 
H17A H 0.2601 0.3945 0.5127 0.081 Uiso 1 1 calc R . . 
C18 C 0.17807(18) 0.3417(3) 0.3947(3) 0.0677(9) Uani 1 1 d . . . 
H18A H 0.1620 0.2801 0.4428 0.081 Uiso 1 1 calc R A . 
C19 C 0.14271(16) 0.3642(3) 0.2809(3) 0.0570(8) Uani 1 1 d . A . 
C20 C 0.07975(18) 0.2948(3) 0.2349(4) 0.0733(10) Uani 1 1 d . . . 
H20A H 0.0618 0.2340 0.2822 0.088 Uiso 1 1 calc R A . 
C21 C 0.0478(2) 0.3185(4) 0.1248(4) 0.0785(11) Uani 1 1 d . A . 
C22 C 0.0731(2) 0.4115(4) 0.0529(4) 0.0905(12) Uani 1 1 d . . . 
H22A H 0.0496 0.4271 -0.0233 0.109 Uiso 1 1 calc R A . 
C23 C 0.1324(2) 0.4795(4) 0.0943(4) 0.0791(11) Uani 1 1 d . A . 
H23A H 0.1489 0.5408 0.0461 0.095 Uiso 1 1 calc R . . 
C24 C 0.16790(17) 0.4562(3) 0.2093(3) 0.0579(8) Uani 1 1 d . . . 
C25 C 0.22913(18) 0.5259(3) 0.2549(3) 0.0588(8) Uani 1 1 d . A . 
H25A H 0.2461 0.5869 0.2068 0.071 Uiso 1 1 calc R . . 
C26 C -0.0422(3) 0.1635(5) 0.1362(6) 0.141(2) Uani 1 1 d . . . 
H26A H -0.0041 0.1050 0.1480 0.212 Uiso 1 1 calc R . . 
H26B H -0.0840 0.1309 0.0896 0.212 Uiso 1 1 calc R . . 
H26C H -0.0582 0.1894 0.2150 0.212 Uiso 1 1 calc R . . 
  
loop_ 
 _atom_site_aniso_label 
 _atom_site_aniso_U_11 
 _atom_site_aniso_U_22 
 _atom_site_aniso_U_33 
 _atom_site_aniso_U_23 
 _atom_site_aniso_U_13 
 _atom_site_aniso_U_12 
Br 0.0842(3) 0.0739(3) 0.0655(2) -0.01154(17) 0.02054(18) 0.00528(19) 
O1 0.0806(16) 0.0893(18) 0.0648(13) -0.0366(13) 0.0167(12) -0.0187(13) 
O2 0.0923(19) 0.0811(19) 0.0879(17) 0.0019(15) 0.0094(15) 0.0198(16) 
O3 0.0844(18) 0.0904(19) 0.0897(18) 0.0130(16) 0.0183(15) 0.0009(15) 
O4 0.0677(17) 0.132(3) 0.133(2) -0.028(2) -0.0354(17) -0.0122(18) 
C1 0.0443(15) 0.0378(15) 0.0467(14) 0.0035(12) -0.0037(12) 0.0020(12) 
C2 0.0469(16) 0.0391(16) 0.0516(15) 0.0011(12) 0.0000(13) 0.0007(12) 
C3 0.0488(17) 0.0507(18) 0.0520(16) 0.0011(13) 0.0047(14) 0.0047(14) 
C4 0.0523(18) 0.064(2) 0.0622(18) 0.0039(16) 0.0102(15) -0.0039(16) 
C5 0.061(2) 0.058(2) 0.083(2) -0.0013(18) 0.0091(18) -0.0200(16) 
C6 0.0586(19) 0.0475(18) 0.0623(18) -0.0058(14) 0.0029(16) -0.0075(15) 
C7 0.0407(15) 0.0351(14) 0.0438(14) 0.0025(11) -0.0019(12) 0.0050(12) 
C8 0.0457(16) 0.0455(16) 0.0499(15) -0.0058(13) -0.0027(13) -0.0040(13) 
C9 0.0611(19) 0.0561(19) 0.0491(16) -0.0112(15) 0.0046(15) -0.0053(15) 
C10A 0.0489(19) 0.046(2) 0.0445(19) -0.0022(16) 0.0044(16) 0.0039(17) 
C11A 0.0449(19) 0.041(2) 0.0423(19) 0.0003(15) 0.0002(15) 0.0042(16) 
C12A 0.0449(15) 0.0401(15) 0.0420(14) -0.0029(12) 0.0011(12) -0.0015(12) 
C10B 0.0489(19) 0.046(2) 0.0445(19) -0.0022(16) 0.0044(16) 0.0039(17) 
C11B 0.0449(19) 0.041(2) 0.0423(19) 0.0003(15) 0.0002(15) 0.0042(16) 
C12B 0.0449(15) 0.0401(15) 0.0420(14) -0.0029(12) 0.0011(12) -0.0015(12) 
C13 0.058(2) 0.066(2) 0.063(2) -0.0215(18) 0.0102(17) -0.0037(18) 
C14A 0.095(4) 0.153(5) 0.077(5) -0.011(4) 0.039(3) -0.030(4) 
C15A 0.109(4) 0.131(10) 0.169(11) -0.031(6) 0.062(4) -0.032(4) 
C14B 0.095(4) 0.153(5) 0.077(5) -0.011(4) 0.039(3) -0.030(4) 
C15B 0.109(4) 0.131(10) 0.169(11) -0.031(6) 0.062(4) -0.032(4) 
C16 0.0429(17) 0.059(2) 0.0625(19) -0.0153(15) 0.0122(15) -0.0049(14) 
C17 0.056(2) 0.082(2) 0.0635(19) -0.0112(19) -0.0032(16) -0.0049(18) 
C18 0.061(2) 0.069(2) 0.073(2) 0.0034(18) 0.0040(17) -0.0073(17) 
C19 0.0416(16) 0.056(2) 0.074(2) -0.0041(17) 0.0020(15) 0.0019(14) 
C20 0.056(2) 0.067(2) 0.096(3) -0.010(2) -0.007(2) -0.0014(17) 
C21 0.055(2) 0.087(3) 0.092(3) -0.019(2) -0.012(2) 0.007(2) 
C22 0.076(3) 0.107(3) 0.087(3) -0.012(3) -0.020(2) 0.012(3) 
C23 0.080(3) 0.084(3) 0.073(2) 0.006(2) -0.001(2) 0.002(2) 
C24 0.0546(18) 0.060(2) 0.0594(18) -0.0068(16) 0.0011(15) 0.0122(16) 
C25 0.0574(19) 0.058(2) 0.0620(19) -0.0099(16) 0.0093(16) -0.0032(16) 
C26 0.090(3) 0.104(4) 0.226(6) -0.002(4) -0.041(4) -0.035(3) 
  
_geom_special_details 
; 
 All esds (except the esd in the dihedral angle between two l.s. planes) 
 are estimated using the full covariance matrix.  The cell esds are taken 
 into account individually in the estimation of esds in distances, angles 
 and torsion angles; correlations between esds in cell parameters are only 
 used when they are defined by crystal symmetry.  An approximate (isotropic) 
 treatment of cell esds is used for estimating esds involving l.s. planes. 
; 
  
loop_ 
 _geom_bond_atom_site_label_1 
 _geom_bond_atom_site_label_2 
 _geom_bond_distance 
 _geom_bond_site_symmetry_2 
 _geom_bond_publ_flag 
Br C3 1.895(3) . ? 
O1 C9 1.212(3) . ? 
O2 C13 1.191(4) . ? 
O3 C13 1.310(4) . ? 
O3 C14A 1.444(5) . ? 
O3 C14B 1.444(5) . ? 
O4 C21 1.384(4) . ? 
O4 C26 1.432(6) . ? 
C1 C6 1.396(4) . ? 
C1 C2 1.396(4) . ? 
C1 C7 1.484(4) . ? 
C2 C3 1.381(4) . ? 
C2 H2A 0.9300 . ? 
C3 C4 1.371(4) . ? 
C4 C5 1.381(4) . ? 
C4 H4A 0.9300 . ? 
C5 C6 1.379(4) . ? 
C5 H5A 0.9300 . ? 
C6 H6A 0.9300 . ? 
C7 C8 1.341(3) . ? 
C7 C12A 1.505(4) . ? 
C8 C9 1.441(4) . ? 
C8 H8A 0.9300 . ? 
C9 C10A 1.524(4) . ? 
C9 C10B 1.642(17) . ? 
C10A C13 1.520(5) . ? 
C10A C11A 1.523(4) . ? 
C10A H10A 0.9800 . ? 
C11A C16 1.519(4) . ? 
C11A C12A 1.530(4) . ? 
C11A H11A 0.9800 . ? 
C12A H12A 0.9700 . ? 
C12A H12B 0.9700 . ? 
C10B C11B 1.511(15) . ? 
C10B C13 1.582(16) . ? 
C10B H10B 0.9800 . ? 
C11B C16 1.649(17) . ? 
C11B H11B 0.9800 . ? 
C14A C15A 1.440(7) . ? 
C14A H14A 0.9700 . ? 
C14A H14B 0.9700 . ? 
C15A H15A 0.9600 . ? 
C15A H15B 0.9600 . ? 
C15A H15C 0.9600 . ? 
C14B C15B 1.440(8) . ? 
C14B H14C 0.9700 . ? 
C14B H14D 0.9700 . ? 
C15B H15D 0.9600 . ? 
C15B H15E 0.9600 . ? 
C15B H15F 0.9600 . ? 
C16 C25 1.344(4) . ? 
C16 C17 1.419(5) . ? 
C17 C18 1.374(4) . ? 
C17 H17A 0.9300 . ? 
C18 C19 1.388(4) . ? 
C18 H18A 0.9300 . ? 
C19 C24 1.394(4) . ? 
C19 C20 1.449(4) . ? 
C20 C21 1.330(5) . ? 
C20 H20A 0.9300 . ? 
C21 C22 1.405(6) . ? 
C22 C23 1.376(5) . ? 
C22 H22A 0.9300 . ? 
C23 C24 1.402(5) . ? 
C23 H23A 0.9300 . ? 
C24 C25 1.427(4) . ? 
C25 H25A 0.9300 . ? 
C26 H26A 0.9600 . ? 
C26 H26B 0.9600 . ? 
C26 H26C 0.9600 . ? 
  
loop_ 
 _geom_angle_atom_site_label_1 
 _geom_angle_atom_site_label_2 
 _geom_angle_atom_site_label_3 
 _geom_angle 
 _geom_angle_site_symmetry_1 
 _geom_angle_site_symmetry_3 
 _geom_angle_publ_flag 
C13 O3 C14A 118.8(4) . . ? 
C13 O3 C14B 106.5(19) . . ? 
C21 O4 C26 117.2(4) . . ? 
C6 C1 C2 117.6(3) . . ? 
C6 C1 C7 121.2(3) . . ? 
C2 C1 C7 121.1(2) . . ? 
C3 C2 C1 120.0(3) . . ? 
C3 C2 H2A 120.0 . . ? 
C1 C2 H2A 120.0 . . ? 
C4 C3 C2 122.3(3) . . ? 
C4 C3 Br 118.6(2) . . ? 
C2 C3 Br 119.1(2) . . ? 
C3 C4 C5 117.9(3) . . ? 
C3 C4 H4A 121.0 . . ? 
C5 C4 H4A 121.0 . . ? 
C6 C5 C4 121.1(3) . . ? 
C6 C5 H5A 119.4 . . ? 
C4 C5 H5A 119.4 . . ? 
C5 C6 C1 121.0(3) . . ? 
C5 C6 H6A 119.5 . . ? 
C1 C6 H6A 119.5 . . ? 
C8 C7 C1 121.1(2) . . ? 
C8 C7 C12A 119.9(2) . . ? 
C1 C7 C12A 119.0(2) . . ? 
C7 C8 C9 123.8(3) . . ? 
C7 C8 H8A 118.1 . . ? 
C9 C8 H8A 118.1 . . ? 
O1 C9 C8 122.7(3) . . ? 
O1 C9 C10A 119.6(3) . . ? 
C8 C9 C10A 117.5(2) . . ? 
O1 C9 C10B 120.0(5) . . ? 
C8 C9 C10B 110.1(6) . . ? 
C13 C10A C11A 111.5(3) . . ? 
C13 C10A C9 108.4(3) . . ? 
C11A C10A C9 110.3(3) . . ? 
C13 C10A H10A 108.9 . . ? 
C11A C10A H10A 108.9 . . ? 
C9 C10A H10A 108.9 . . ? 
C16 C11A C10A 112.2(3) . . ? 
C16 C11A C12A 111.6(3) . . ? 
C10A C11A C12A 109.9(3) . . ? 
C16 C11A H11A 107.7 . . ? 
C10A C11A H11A 107.7 . . ? 
C12A C11A H11A 107.7 . . ? 
C7 C12A C11A 113.1(2) . . ? 
C7 C12A H12A 109.0 . . ? 
C11A C12A H12A 109.0 . . ? 
C7 C12A H12B 109.0 . . ? 
C11A C12A H12B 109.0 . . ? 
H12A C12A H12B 107.8 . . ? 
C11B C10B C13 108.8(12) . . ? 
C11B C10B C9 99.6(11) . . ? 
C13 C10B C9 99.9(9) . . ? 
C11B C10B H10B 115.5 . . ? 
C13 C10B H10B 115.5 . . ? 
C9 C10B H10B 115.5 . . ? 
C10B C11B C16 101.6(12) . . ? 
C10B C11B H11B 113.5 . . ? 
C16 C11B H11B 113.5 . . ? 
O2 C13 O3 124.6(3) . . ? 
O2 C13 C10A 128.8(3) . . ? 
O3 C13 C10A 106.7(3) . . ? 
O2 C13 C10B 95.7(7) . . ? 
O3 C13 C10B 139.6(7) . . ?  
C15A C14A O3 109.5(5) . . ? 
C15A C14A H14A 109.8 . . ? 
O3 C14A H14A 109.8 . . ? 
C15A C14A H14B 109.8 . . ? 
O3 C14A H14B 109.8 . . ? 
H14A C14A H14B 108.2 . . ? 
C15B C14B O3 109.5(5) . . ? 
C15B C14B H14C 109.8 . . ? 
O3 C14B H14C 109.8 . . ? 
C15B C14B H14D 109.7 . . ? 
O3 C14B H14D 109.8 . . ? 
H14C C14B H14D 108.2 . . ? 
C14B C15B H15D 109.4 . . ? 
C14B C15B H15E 109.5 . . ? 
H15D C15B H15E 109.5 . . ? 
C14B C15B H15F 109.5 . . ? 
H15D C15B H15F 109.5 . . ? 
H15E C15B H15F 109.5 . . ? 
C25 C16 C17 118.0(3) . . ? 
C25 C16 C11A 117.5(3) . . ? 
C17 C16 C11A 124.5(3) . . ? 
C25 C16 C11B 142.2(6) . . ? 
C17 C16 C11B 98.7(6) . . ? 
C18 C17 C16 121.8(3) . . ? 
C18 C17 H17A 119.1 . . ? 
C16 C17 H17A 119.1 . . ? 
C17 C18 C19 120.0(3) . . ? 
C17 C18 H18A 120.0 . . ? 
C19 C18 H18A 120.0 . . ? 
C18 C19 C24 119.3(3) . . ? 
C18 C19 C20 121.5(3) . . ? 
C24 C19 C20 119.1(3) . . ? 
C21 C20 C19 119.7(4) . . ? 
C21 C20 H20A 120.2 . . ? 
C19 C20 H20A 120.2 . . ? 
C20 C21 O4 125.8(4) . . ? 
C20 C21 C22 121.1(4) . . ? 
O4 C21 C22 113.1(4) . . ? 
C23 C22 C21 120.7(4) . . ? 
C23 C22 H22A 119.7 . . ? 
C21 C22 H22A 119.7 . . ? 
C22 C23 C24 119.8(4) . . ? 
C22 C23 H23A 120.1 . . ? 
C24 C23 H23A 120.1 . . ? 
C19 C24 C23 119.6(3) . . ? 
C19 C24 C25 119.3(3) . . ? 
C23 C24 C25 121.0(3) . . ? 
C16 C25 C24 121.6(3) . . ? 
C16 C25 H25A 119.2 . . ? 
C24 C25 H25A 119.2 . . ? 
O4 C26 H26A 109.5 . . ? 
O4 C26 H26B 109.5 . . ? 
H26A C26 H26B 109.5 . . ? 
O4 C26 H26C 109.5 . . ? 
H26A C26 H26C 109.5 . . ? 
H26B C26 H26C 109.5 . . ? 
  
loop_ 
 _geom_torsion_atom_site_label_1 
 _geom_torsion_atom_site_label_2 
 _geom_torsion_atom_site_label_3 
 _geom_torsion_atom_site_label_4 
 _geom_torsion 
 _geom_torsion_site_symmetry_1 
 _geom_torsion_site_symmetry_2 
 _geom_torsion_site_symmetry_3 
 _geom_torsion_site_symmetry_4 
 _geom_torsion_publ_flag 
C6 C1 C2 C3 0.7(4) . . . . ? 
C7 C1 C2 C3 178.1(2) . . . . ? 
C1 C2 C3 C4 0.3(4) . . . . ? 
C1 C2 C3 Br -178.73(19) . . . . ? 
C2 C3 C4 C5 -0.8(5) . . . . ? 
Br C3 C4 C5 178.3(2) . . . . ? 
C3 C4 C5 C6 0.2(5) . . . . ? 
C4 C5 C6 C1 0.9(5) . . . . ? 
C2 C1 C6 C5 -1.4(4) . . . . ? 
C7 C1 C6 C5 -178.7(3) . . . . ? 
C6 C1 C7 C8 -16.8(4) . . . . ? 
C2 C1 C7 C8 166.0(3) . . . . ? 
C6 C1 C7 C12A 161.8(2) . . . . ? 
C2 C1 C7 C12A -15.4(4) . . . . ? 
C1 C7 C8 C9 173.8(3) . . . . ? 
C12A C7 C8 C9 -4.8(4) . . . . ? 
C7 C8 C9 O1 -174.8(3) . . . . ? 
C7 C8 C9 C10A 9.9(4) . . . . ? 
C7 C8 C9 C10B -24.6(7) . . . . ? 
O1 C9 C10A C13 26.8(4) . . . . ? 
C8 C9 C10A C13 -157.8(3) . . . . ? 
C10B C9 C10A C13 -73.4(10) . . . . ? 
O1 C9 C10A C11A 149.1(3) . . . . ? 
C8 C9 C10A C11A -35.5(4) . . . . ? 
C10B C9 C10A C11A 48.9(9) . . . . ? 
C13 C10A C11A C16 -59.5(4) . . . . ? 
C9 C10A C11A C16 -179.9(3) . . . . ? 
C13 C10A C11A C12A 175.8(3) . . . . ? 
C9 C10A C11A C12A 55.3(4) . . . . ? 
C8 C7 C12A C11A 26.2(4) . . . . ? 
C1 C7 C12A C11A -152.4(3) . . . . ? 
C16 C11A C12A C7 -176.5(3) . . . . ? 
C10A C11A C12A C7 -51.5(4) . . . . ? 
O1 C9 C10B C11B -147.6(8) . . . . ? 
C8 C9 C10B C11B 61.2(11) . . . . ? 
C10A C9 C10B C11B -48.7(9) . . . . ? 
O1 C9 C10B C13 -36.4(11) . . . . ? 
C8 C9 C10B C13 172.4(5) . . . . ? 
C10A C9 C10B C13 62.5(10) . . . . ? 
C13 C10B C11B C16 73.2(13) . . . . ? 
C9 C10B C11B C16 177.2(8) . . . . ? 
C14A O3 C13 O2 -2.9(6) . . . . ? 
C14B O3 C13 O2 12.7(15) . . . . ? 
C14A O3 C13 C10A 176.5(4) . . . . ? 
C14B O3 C13 C10A -167.9(14) . . . . ? 
C14A O3 C13 C10B 172.0(9) . . . . ? 
C14B O3 C13 C10B -172.4(16) . . . . ? 
C11A C10A C13 O2 -40.7(5) . . . . ? 
C9 C10A C13 O2 80.9(4) . . . . ? 
C11A C10A C13 O3 139.9(3) . . . . ? 
C9 C10A C13 O3 -98.5(3) . . . . ? 
C11A C10A C13 C10B -45.4(10) . . . . ? 
C9 C10A C13 C10B 76.1(11) . . . . ? 
C11B C10B C13 O2 -132.7(12) . . . . ? 
C9 C10B C13 O2 123.5(7) . . . . ? 
C11B C10B C13 O3 51.5(17) . . . . ? 
C9 C10B C13 O3 -52.3(12) . . . . ? 
C11B C10B C13 C10A 43.5(10) . . . . ? 
C9 C10B C13 C10A -60.2(9) . . . . ? 
C13 O3 C14A C15A 95.0(9) . . . . ? 
C14B O3 C14A C15A 42(6) . . . . ? 
C13 O3 C14B C15B 107(5) . . . . ? 
C14A O3 C14B C15B -119(8) . . . . ? 
C10A C11A C16 C25 149.9(3) . . . . ? 
C12A C11A C16 C25 -86.4(4) . . . . ? 
C10A C11A C16 C17 -28.9(5) . . . . ? 
C12A C11A C16 C17 94.8(4) . . . . ? 
C10A C11A C16 C11B -52.1(10) . . . . ? 
C12A C11A C16 C11B 71.7(10) . . . . ? 
C10B C11B C16 C25 78.5(12) . . . . ? 
C10B C11B C16 C17 -115.1(10) . . . . ? 
C10B C11B C16 C11A 45.8(10) . . . . ? 
C25 C16 C17 C18 -0.9(5) . . . . ? 
C11A C16 C17 C18 177.9(3) . . . . ? 
C11B C16 C17 C18 -171.5(5) . . . . ? 
C16 C17 C18 C19 0.1(5) . . . . ? 
C17 C18 C19 C24 0.6(5) . . . . ? 
C17 C18 C19 C20 -178.9(3) . . . . ? 
C18 C19 C20 C21 -179.4(3) . . . . ? 
C24 C19 C20 C21 1.1(5) . . . . ? 
C19 C20 C21 O4 -179.2(3) . . . . ? 
C19 C20 C21 C22 -1.3(6) . . . . ? 
C26 O4 C21 C20 -2.7(6) . . . . ? 
C26 O4 C21 C22 179.2(4) . . . . ? 
C20 C21 C22 C23 0.8(6) . . . . ? 
O4 C21 C22 C23 178.9(4) . . . . ? 
C21 C22 C23 C24 -0.1(6) . . . . ? 
C18 C19 C24 C23 -179.9(3) . . . . ? 
C20 C19 C24 C23 -0.4(5) . . . . ? 
C18 C19 C24 C25 -0.5(5) . . . . ? 
C20 C19 C24 C25 179.1(3) . . . . ? 
C22 C23 C24 C19 -0.1(5) . . . . ? 
C22 C23 C24 C25 -179.5(3) . . . . ? 
C17 C16 C25 C24 1.1(5) . . . . ? 
C11A C16 C25 C24 -177.8(3) . . . . ? 
C11B C16 C25 C24 165.8(8) . . . . ? 
C19 C24 C25 C16 -0.4(5) . . . . ? 
C23 C24 C25 C16 179.1(3) . . . . ? 
  
loop_ 
 _geom_hbond_atom_site_label_D 
 _geom_hbond_atom_site_label_H 
 _geom_hbond_atom_site_label_A 
 _geom_hbond_distance_DH 
 _geom_hbond_distance_HA 
 _geom_hbond_distance_DA 
 _geom_hbond_angle_DHA 
 _geom_hbond_site_symmetry_A 
C12B H12D O1  0.97 2.34 3.114(3) 136.1 4_575 
  
_diffrn_measured_fraction_theta_max    0.921 
_diffrn_reflns_theta_full              25.50 
_diffrn_measured_fraction_theta_full   0.991 
_refine_diff_density_max    0.398 
_refine_diff_density_min   -0.597 
_refine_diff_density_rms    0.052 
  
_iucr_refine_instructions_details
;
TITL hsy716a in P2(1)/c
REM P2(1)/c (#14 in standard setting)
CELL 0.71073  17.8991  11.4369  10.8507  90.0000  92.4282  90.0000
ZERR    4.00   0.0009   0.0006   0.0005   0.0000   0.0044   0.0000
LATT  1
SYMM -x, y+1/2,-z+1/2
SFAC C H O Br
UNIT 104 92 16 4
TEMP 22
L.S. 50
rem DAMP 50
ACTA 51
BOND   $H
CONF
HTAB C12B O1_$1
EQIV $1 X, 3/2-Y, Z-1/2
EXYZ C12A C12B
EADP C10A C10B
EADP C11A C11B
EADP C12A C12B
EADP C14A C14B
EADP C15A C15B
DFIX 31.0 .001 O3 C14A O3 C14B
DFIX 41.0 .001 C14A C15A C14B C15B
DFIX 51.0 .001 O3 C15A O3 C15B
WGHT    0.048800    0.154800
FVAR       1.00810   0.81892   1.44396   1.44040   2.35491
BR    4    0.619478    0.465584    0.030255    11.00000    0.08421    0.07393 =
         0.06549   -0.01154    0.02054    0.00528
O1    3    0.390827    0.741770    0.677838    11.00000    0.08064    0.08927 =
         0.06483   -0.03663    0.01669   -0.01869
O2    3    0.219946    0.722631    0.556545    11.00000    0.09227    0.08107 =
         0.08794    0.00188    0.00937    0.01977
O3    3    0.248322    0.590034    0.699759    11.00000    0.08438    0.09042 =
         0.08970    0.01298    0.01834    0.00086
O4    3   -0.012950    0.260625    0.070487    11.00000    0.06766    0.13157 =
         0.13264   -0.02783   -0.03543   -0.01221
C1    1    0.532039    0.633985    0.330683    11.00000    0.04427    0.03782 =
         0.04670    0.00347   -0.00372    0.00202
C2    1    0.544189    0.556352    0.234255    11.00000    0.04694    0.03909 =
         0.05160    0.00110    0.00004    0.00074
AFIX  43
H2A   2    0.510961    0.495159    0.218262    11.00000   -1.20000
AFIX   0
C3    1    0.605512    0.570378    0.162618    11.00000    0.04877    0.05068 =
         0.05200    0.00110    0.00471    0.00474
C4    1    0.656310    0.658727    0.182721    11.00000    0.05234    0.06365 =
         0.06217    0.00388    0.01018   -0.00392
AFIX  43
H4A   2    0.697610    0.666224    0.134124    11.00000   -1.20000
AFIX   0
C5    1    0.644254    0.736243    0.277369    11.00000    0.06143    0.05761 =
         0.08314   -0.00132    0.00906   -0.02003
AFIX  43
H5A   2    0.677914    0.797014    0.292588    11.00000   -1.20000
AFIX   0
C6    1    0.583162    0.725094    0.349711    11.00000    0.05856    0.04754 =
         0.06232   -0.00582    0.00287   -0.00749
AFIX  43
H6A   2    0.575890    0.779095    0.412152    11.00000   -1.20000
AFIX   0
C7    1    0.465346    0.623121    0.406579    11.00000    0.04074    0.03510 =
         0.04380    0.00252   -0.00191    0.00505
C8    1    0.461085    0.680649    0.513736    11.00000    0.04568    0.04548 =
         0.04995   -0.00577   -0.00267   -0.00396
AFIX  43
H8A   2    0.503038    0.721495    0.543348    11.00000   -1.20000
AFIX   0
C9    1    0.395242    0.682817    0.585633    11.00000    0.06110    0.05610 =
         0.04912   -0.01119    0.00460   -0.00528
PART   1
C10A  1    0.331687    0.599956    0.547764    21.00000    0.04894    0.04635 =
         0.04450   -0.00222    0.00444    0.00389
AFIX  13
H10A  2    0.341972    0.523018    0.584448    21.00000   -1.20000
AFIX   0
C11A  1    0.325801    0.587384    0.407979    21.00000    0.04492    0.04112 =
         0.04227    0.00032    0.00022    0.00417
AFIX  13
H11A  2    0.314563    0.664771    0.373125    21.00000   -1.20000
AFIX   0
C12A  1    0.400995    0.548155    0.360284    21.00000    0.04494    0.04015 =
         0.04200   -0.00286    0.00110   -0.00151
AFIX  23
H12A  2    0.410296    0.467915    0.385505    21.00000   -1.20000
H12B  2    0.398333    0.550152    0.270835    21.00000   -1.20000
AFIX   0
PART   2
SAME C10A > C12A
C10B  1    0.320430    0.658393    0.496612   -21.00000    0.04894    0.04635 =
         0.04450   -0.00222    0.00444    0.00389
AFIX  13
H10B  2    0.309871    0.717051    0.432378   -21.00000   -1.20000
AFIX   0
C11B  1    0.338830    0.537489    0.450664   -21.00000    0.04492    0.04112 =
         0.04227    0.00032    0.00022    0.00417
AFIX  13
H11B  2    0.349764    0.481164    0.517062   -21.00000   -1.20000
AFIX   0
C12B  1    0.400995    0.548155    0.360284   -21.00000    0.04494    0.04015 =
         0.04200   -0.00286    0.00110   -0.00151
AFIX  23
H12C  2    0.419628    0.470597    0.342462   -21.00000   -1.20000
H12D  2    0.380447    0.580952    0.283684   -21.00000   -1.20000
AFIX   0
PART   0
C13   1    0.259705    0.647506    0.597809    11.00000    0.05813    0.06594 =
         0.06338   -0.02149    0.01017   -0.00371
PART   1
C14A  1    0.185393    0.621963    0.771643    21.00000    0.09542    0.15287 =
         0.07701   -0.01133    0.03890   -0.03036
AFIX  23
H14A  2    0.198565    0.613446    0.858816    21.00000   -1.20000
H14B  2    0.172146    0.703032    0.756111    21.00000   -1.20000
AFIX   0
C15A  1    0.122726    0.547682    0.738550    21.00000    0.10878    0.13051 =
         0.16888   -0.03050    0.06175   -0.03162
AFIX 137
H15A  2    0.104441    0.566102    0.656386    21.00000   -1.50000
H15B  2    0.083710    0.560069    0.795172    21.00000   -1.50000
H15C  2    0.138261    0.467367    0.742035    21.00000   -1.50000
AFIX   0
PART   2
SAME C14A > C15A
C14B  1    0.172832    0.616538    0.732567   -21.00000    0.09542    0.15287 =
         0.07701   -0.01133    0.03890   -0.03036
AFIX  23
H14C  2    0.172310    0.637683    0.819098   -21.00000   -1.20000
H14D  2    0.153900    0.682300    0.684197   -21.00000   -1.20000
AFIX   0
C15B  1    0.125991    0.515821    0.709459   -21.00000    0.10878    0.13051 =
         0.16888   -0.03050    0.06175   -0.03162
AFIX 137
H15D  2    0.155295    0.445975    0.720180   -21.00000   -1.50000
H15E  2    0.105154    0.518967    0.626533   -21.00000   -1.50000
H15F  2    0.086306    0.515397    0.766263   -21.00000   -1.50000
AFIX   0
PART   0
C16   1    0.262969    0.505453    0.365800    11.00000    0.04292    0.05941 =
         0.06254   -0.01534    0.01217   -0.00495
C17   1    0.236817    0.410548    0.436276    11.00000    0.05562    0.08169 =
         0.06350   -0.01119   -0.00319   -0.00493
AFIX  43
H17A  2    0.260060    0.394467    0.512675    11.00000   -1.20000
AFIX   0
C18   1    0.178070    0.341733    0.394718    11.00000    0.06121    0.06852 =
         0.07335    0.00341    0.00399   -0.00734
AFIX  43
H18A  2    0.162009    0.280106    0.442849    11.00000   -1.20000
AFIX   0
C19   1    0.142709    0.364249    0.280853    11.00000    0.04159    0.05553 =
         0.07391   -0.00411    0.00196    0.00186
C20   1    0.079746    0.294834    0.234939    11.00000    0.05589    0.06724 =
         0.09601   -0.00998   -0.00711   -0.00139
AFIX  43
H20A  2    0.061759    0.234013    0.282236    11.00000   -1.20000
AFIX   0
C21   1    0.047807    0.318527    0.124838    11.00000    0.05493    0.08697 =
         0.09240   -0.01881   -0.01180    0.00708
C22   1    0.073150    0.411452    0.052948    11.00000    0.07590    0.10666 =
         0.08693   -0.01169   -0.01993    0.01166
AFIX  43
H22A  2    0.049627    0.427086   -0.023338    11.00000   -1.20000
AFIX   0
C23   1    0.132406    0.479544    0.094265    11.00000    0.07973    0.08393 =
         0.07323    0.00580   -0.00101    0.00159
AFIX  43
H23A  2    0.148868    0.540835    0.046055    11.00000   -1.20000
AFIX   0
C24   1    0.167900    0.456233    0.209294    11.00000    0.05457    0.05964 =
         0.05936   -0.00677    0.00113    0.01224
C25   1    0.229132    0.525881    0.254942    11.00000    0.05740    0.05751 =
         0.06196   -0.00987    0.00931   -0.00324
AFIX  43
H25A  2    0.246051    0.586910    0.206823    11.00000   -1.20000
AFIX   0
C26   1   -0.042248    0.163477    0.136184    11.00000    0.08967    0.10418 =
         0.22556   -0.00180   -0.04086   -0.03480
AFIX 137
H26A  2   -0.004112    0.105040    0.147982    11.00000   -1.50000
H26B  2   -0.084034    0.130858    0.089644    11.00000   -1.50000
H26C  2   -0.058245    0.189385    0.214983    11.00000   -1.50000
 
HKLF 4
 
REM  hsy716a in P2(1)/c
REM R1 =  0.0533 for   2942 Fo > 4sig(Fo)  and  0.1669 for all   7380 data
REM    299 parameters refined using     10 restraints
 
END  
     
WGHT      0.0496      0.1352 
REM Highest difference peak  0.398,  deepest hole -0.597,  1-sigma level  0.052
Q1    1   0.6146  0.6019  0.0219  11.00000  0.05    0.40
Q2    1   0.6324  0.5248  0.0661  11.00000  0.05    0.35
Q3    1   0.6347  0.4085  0.0846  11.00000  0.05    0.34
Q4    1   0.6703  0.4205  0.0640  11.00000  0.05    0.28
Q5    1   0.5656  0.4646  0.1059  11.00000  0.05    0.26
Q6    1   0.0589  0.2372  0.3197  11.00000  0.05    0.25
Q7    1   0.5502  0.4683  0.0795  11.00000  0.05    0.25
Q8    1   0.4642  0.6227  0.4766  11.00000  0.05    0.24
Q9    1   0.6710  0.4641  0.1188  11.00000  0.05    0.24
Q10   1   0.2812  0.4531  0.4018  11.00000  0.05    0.22
Q11   1   0.6135  0.5366  0.1242  11.00000  0.05    0.21
Q12   1   0.6715  0.5453  0.0039  11.00000  0.05    0.21
Q13   1   0.1533  0.4685 -0.0803  11.00000  0.05    0.21
Q14   1   0.5495  0.4655 -0.0753  11.00000  0.05    0.21
Q15   1   0.6731  0.4599 -0.0462  11.00000  0.05    0.20
Q16   1   0.7124  0.7996  0.3284  11.00000  0.05    0.20
Q17   1   0.2275  0.5309  0.8621  11.00000  0.05    0.20
Q18   1   0.5519  0.5345 -0.0191  11.00000  0.05    0.19
Q19   1   0.6500  0.8810  0.4456  11.00000  0.05    0.19
Q20   1   0.5343  0.6088  0.2773  11.00000  0.05    0.19
;
